# Supplementary material for: CRISPR/Cas9-Mediated Mutation in XSP10 and SlSAMT Genes Impart Genetic Tolerance to Fusarium Wilt Disease of Tomato (Solanum lycopersicum L.)
Source: MDPI journal article supplement (doi:10.3390/genes14020488), 2023-02-14
Supplement: s1 [file s1]

Supplementary Materials

# CRISPR/Cas9-Mediated Mutation in *XSP10* and *SISAMT* Genes Impart Genetic Tolerance to Fusarium Wilt Disease of Tomato (*Solanum lycopersicum* L.)

## Supplementary Information

### Supplementary Figures:

**Supplementary Figure S1.** Overview of sgRNA design, CRISPR cloning into expression vector, protoplast transformation and sequencing for editing events.

**Supplementary Figure S2.** Molecular confirmation of CRISPR transformants in tomato protoplasts.

**Supplementary Figure S3.** Molecular and histochemical confirmation of positive transformants of single and DXS. A-D.

**Supplementary Figure S4.** Chromatograms confirming the CRISPR editing events of single and dual-gene in tomato leaves tolerant to *Fol 1322*.

**Supplementary Figure S5.** Pathogen leaf disc assay for single-gene CRISPR edited tomato leaves infected with *Fol 1322* strain.

**Supplementary Figure S6.** Positive plant transformants of CRISPR/Cas9 construct.

**Supplementary Figure S7.** Chromatograms confirming the CRISPR editing events of single and dual-gene of *S. lycopersicum* cv. Arka Vikas at GE<sub>0</sub> generation.

**Supplementary Figure S8.** Sanger sequencing and chromatograms confirming the CRISPR editing events of SX and SS of GE<sub>0</sub> generation from *S. lycopersicum* L.

**Supplementary Figure S9.** Presence of T-DNA integration in GE<sub>1</sub> progeny.

**Supplementary Figure S10.** Sanger sequencing and chromatograms confirming the CRISPR editing events of single (SX and SS) and dual-gene (DXS) of GE<sub>1</sub> generation from *S. lycopersicum* L.

**Supplementary Figure S11.** *Fol 1322* colonization in 10-12 days old seedlings of tomato cv. AV at 12 h and 24 h post-inoculation.

**Supplementary Figure S12.** Single and dual-gene CRELS of *XSP10* and *SISAMT* showed reduced necrotic lesions upon *Fol 1322* infection in tomato leaves.

**Supplementary Figure S13.** Potential off-target sites generated in GE<sub>0</sub> CRELS by Sanger sequencing method.

### Supplementary Tables:

**Supplementary Table S1.** Primers used in this study.

**Supplementary Table S2.** Summary of sgRNA design of target genes *XSP10* and *SISAMT* along with off-target details.

**Supplementary Table S3.** Data measurement of lesion size upon *Fol 1322* infection in control and single-gene constructs using Image J software.

**Supplementary Table S4.** Data measurement of lesion size upon *Fol 1322* infection in control and dual-gene (DXS) constructs using Image J software.

**Supplementary Table S5.** Statistical data analysis of root colonization in 10–12 days old seedlings of tomato cultivar Arka Vikas using Image J software.

**Supplementary Table S6.** Data measurement of cell death/mm<sup>2</sup> in infected tomato leaves upon *Fol 1322* infection in WT, single (SX and SS) and dual-gene (DXS) constructs using Image J software.

**Supplementary Table S7.** Data measurement of H<sub>2</sub>O<sub>2</sub> release/ mm<sup>2</sup> in infected tomato leaves upon *Fol 1322* infection in WT, single (SX and SS) and dual-gene (DXS) constructs using Image J software.

**Supplementary Table S8.** Data measurement of fresh weight (g) of Mock, WT, single and dual-gene (DXS), and Arka Abhed upon *Fol 1322* infected tomato plants.

**Supplementary Table S9.** Data measurement of disease severity of single and dual-gene (DXS) in 4 weeks old tomato infected plants.

**Supplementary Table S10.** Data measurement of fungus colonization in WT and CRELS upon *Fol 1322* infection in tomato (*S. lycopersicum* L.).

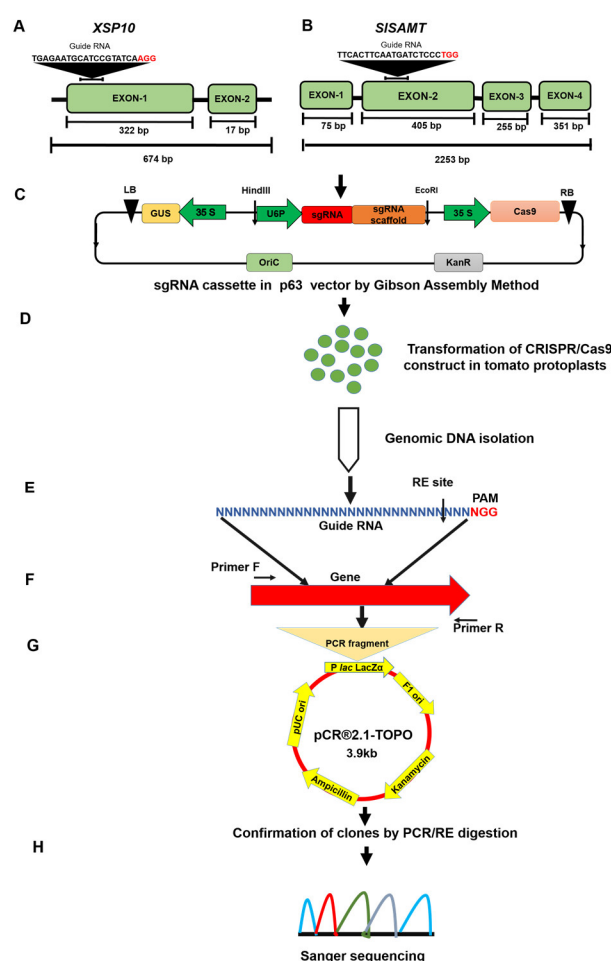

**Supplementary Figure S1.** Overview of sgRNA design, CRISPR cloning into the p63 expression vector, protoplast transformation and sequencing for editing events. sgRNA designing of *XSP10* (A) and *SISAMT* (B). C. sgRNA cassettes assembled in p63 vector by Gibson assembly method. D. The single-gene and dual-gene CRISPR constructs transformed into tomato protoplast cells. E. PCR confirmation of expression of Cas9. F. PCR fragments ligated and cloned into pCR2.1 T/A cloning vector and confirmation by PCR and restriction digestion (G). H. Detection of CRISPR editing events through Sanger sequencing.

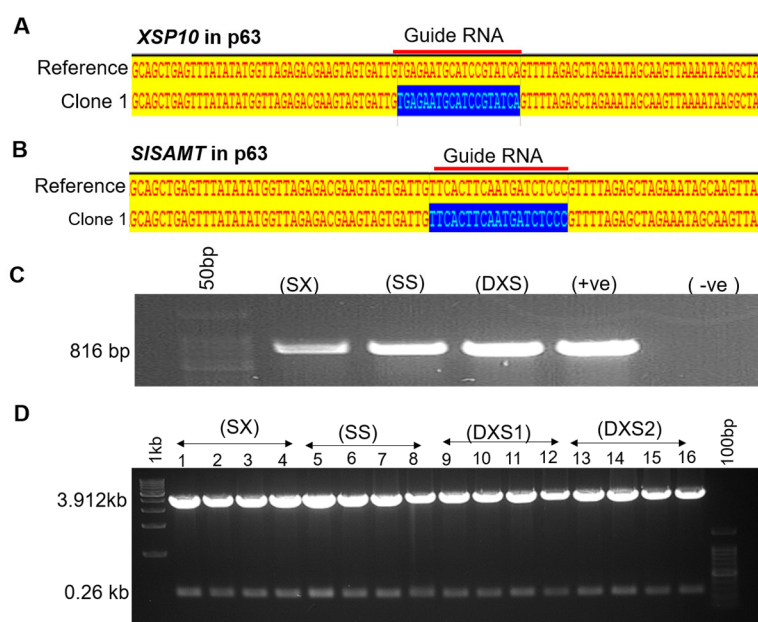

**Supplementary Figure S2. Molecular confirmation of CRISPR transformants in tomato protoplasts.** Confirmation of sgRNA sequence of *XSP10* (A) and *SISAMT* (B) in p63 binary expression vector through Sanger sequencing. C. Detection of Cas9 in transformed tomato protoplasts through PCR of single (SX and SS) and dual gene DXS (D) restriction digestion confirmation of positive clones of single and dual gene PCR product into sub-cloning vector pCR2.1 with enzyme EcoRI.

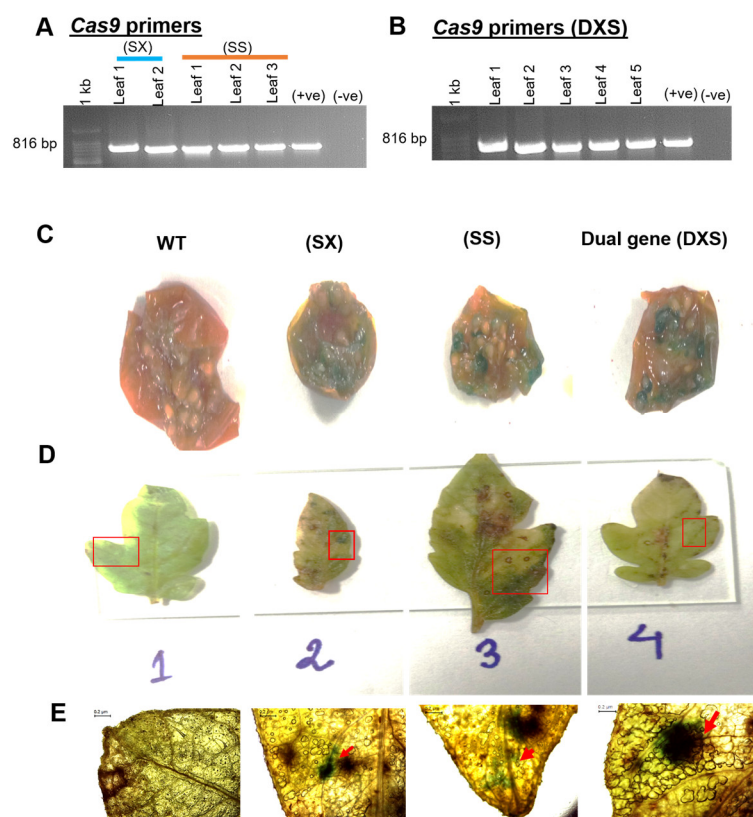

**Supplementary Figure S3. Molecular and histochemical confirmation of positive transformants of single and DXS.** A-B. PCR confirmation using Cas9. Histochemical GUS staining of single and dual-gene (DXS) CRISPR/Cas9 construct of *XSP10* and *SISAMT* in fruit tissues (C) and leaf tissues (D) of tomato cultivar AV.

E. Expanded light microscopy images of leaves showing GUS staining for better clarity. No GUS activity was observed in control (water treated) fruits and leaves. SX: Single-gene editing of *XSP10*, SS: Single-gene editing of *SISAMT*, DXS: Dual-gene editing of *XSP10* and *SISAMT*.

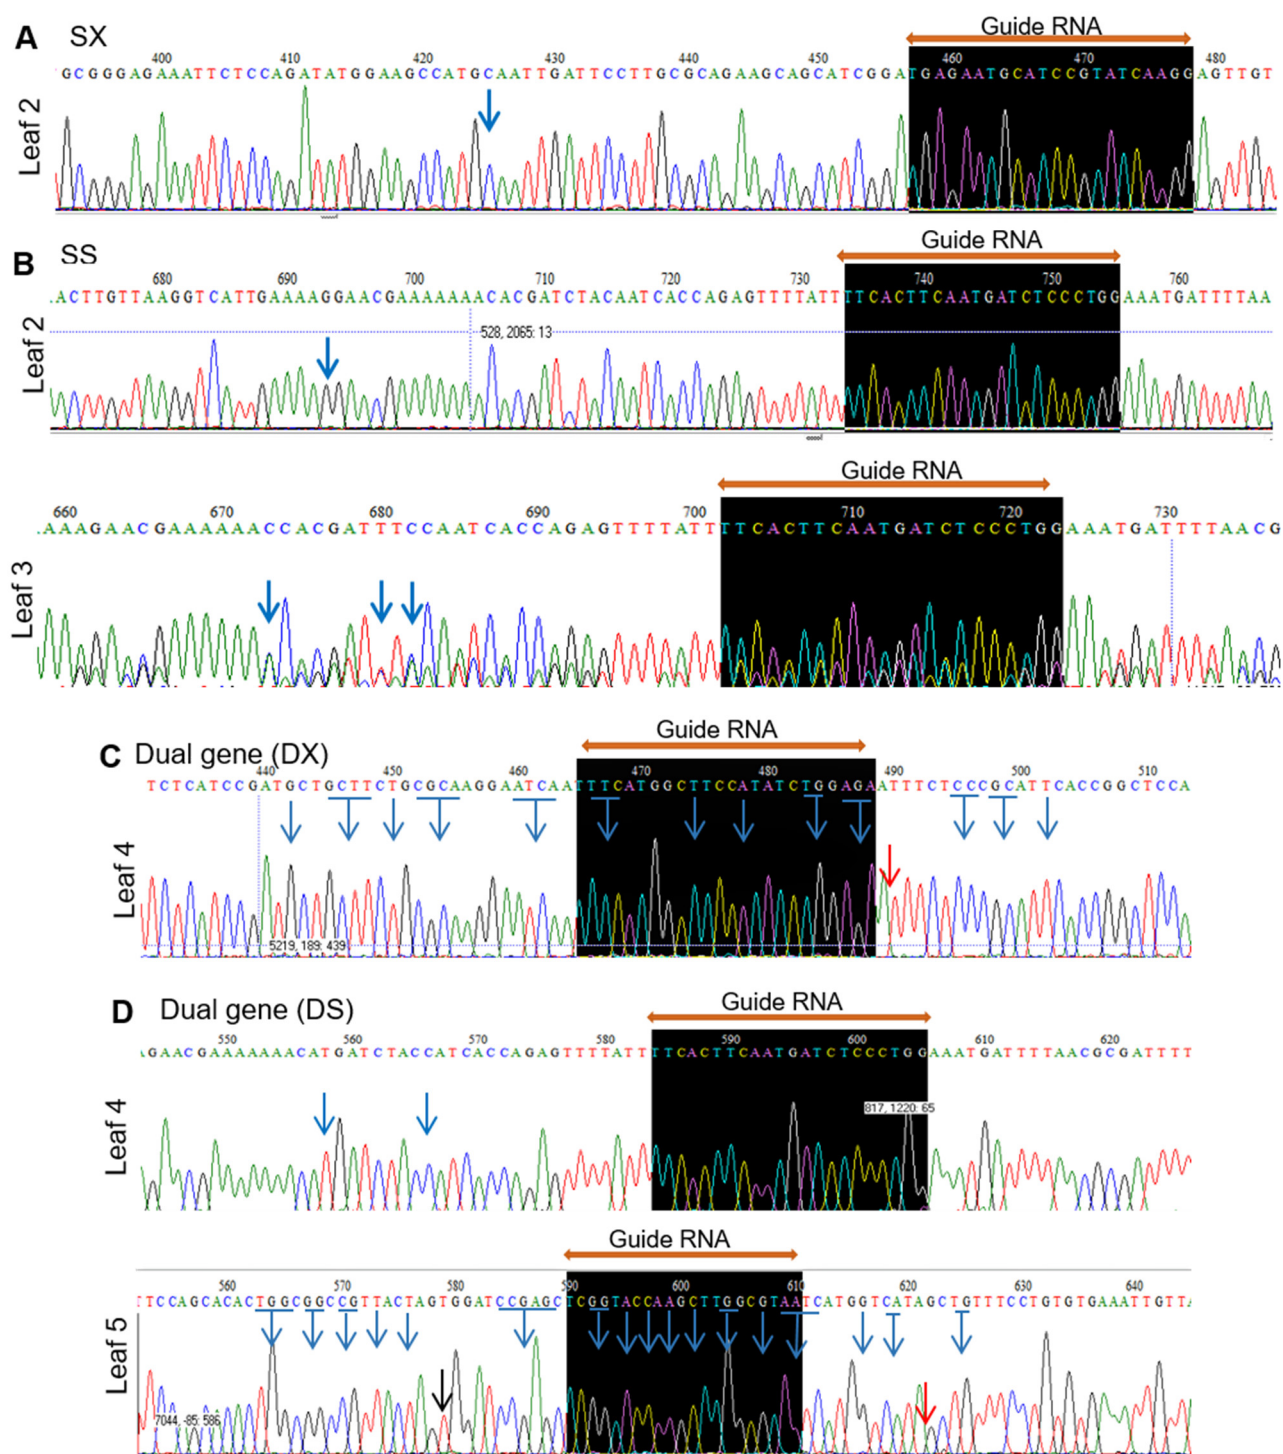

**Supplementary Figure S4.** Chromatograms confirming the CRISPR editing events of single and dual-gene in tomato leaves tolerant to *Fol 1332*. **A.** Leaf 2 of single gene *XSP10* (SX), **B.** Leaf 2, leaf 3 of single gene *SISAMT* (SS), **C.** Leaf 4 of dual gene (DX) and **D.** Leaf 4, Leaf 5 of dual gene (DS). The blue arrow



indicates base substitution (s), black arrow indicate insertion (+) and red indicate deletion (-). SX: Single gene editing of *XSP10*, SS: Single gene editing of *SISAMT*, DXS: Dual gene editing of *XSP10* (DX) and *SISAMT* (DS).

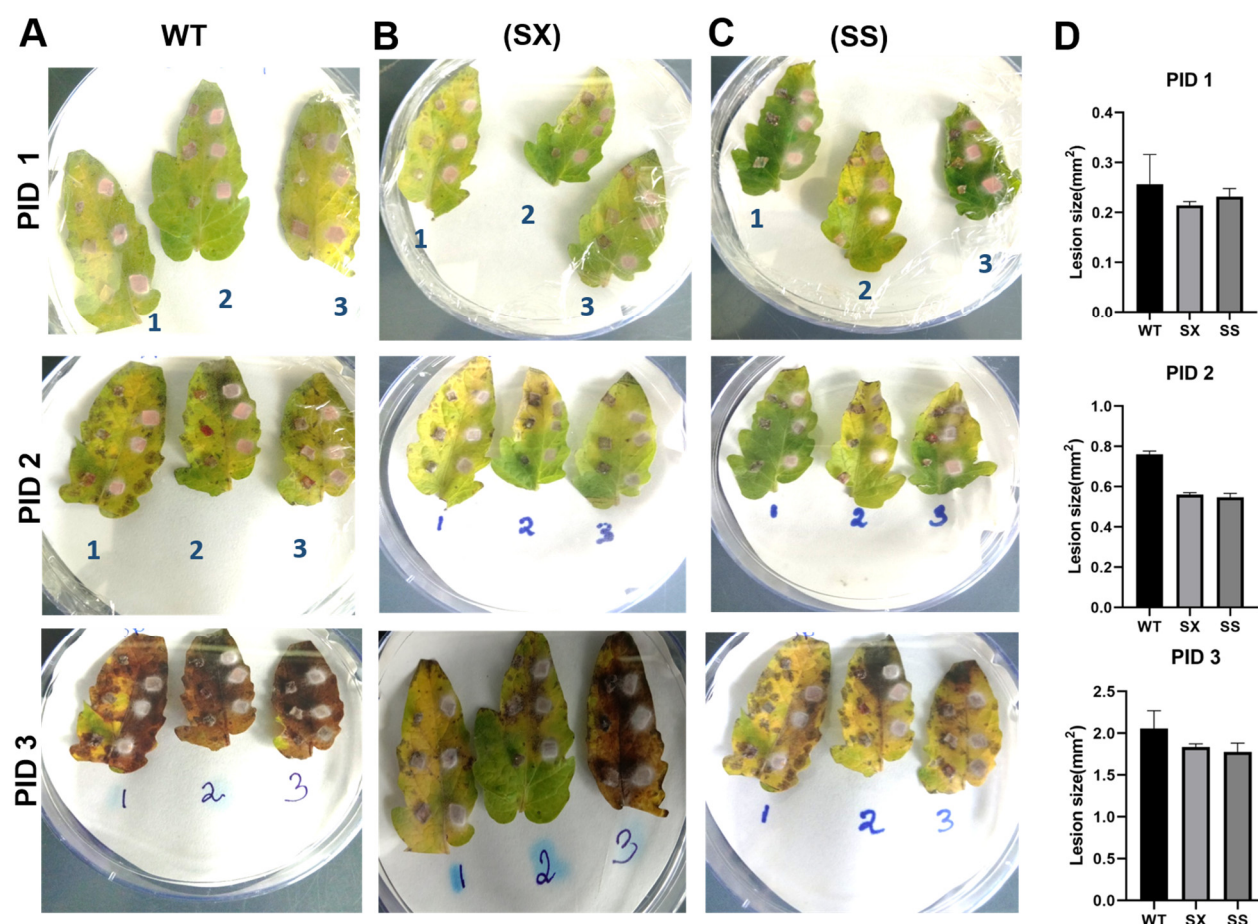

**Supplementary Figure S5. Pathogen leaf disc assay for single gene CRISPR edited tomato leaves infected with *Fol* 1322 strain.** Phenotypic analysis for *Fol* tolerance in single gene CRISPR edited tomato leaves of *XSP10* (SX) (B) and *SISAMT* (SS) (C) infected with *Fol* 1322 strain. WT leaves infected with *Fol* 1322 strain used as control (A). D. Graphical representation of the average mean area (mm<sup>2</sup>) of infected lesions of control wild-type (WT) and single gene CRISPR edited constructs in transient agro-infiltrated leaves of tomato. The area of lesions was measured by Image J software and the average size of lesion taken for statistical significance. Bars represent the average means  $\pm$ SE of measurements from 3 lesion spots from 3 different leaf discs of control and single gene CRISPR/Cas9 constructs. The asterisk denotes a significant difference determined by t-test ( $P^* < 0.05$ ). Single gene CRISPR editing of *XSP10* and *SISAMT* showed subtle phenotypic response against *Fol* infection. PID: Post infection day.

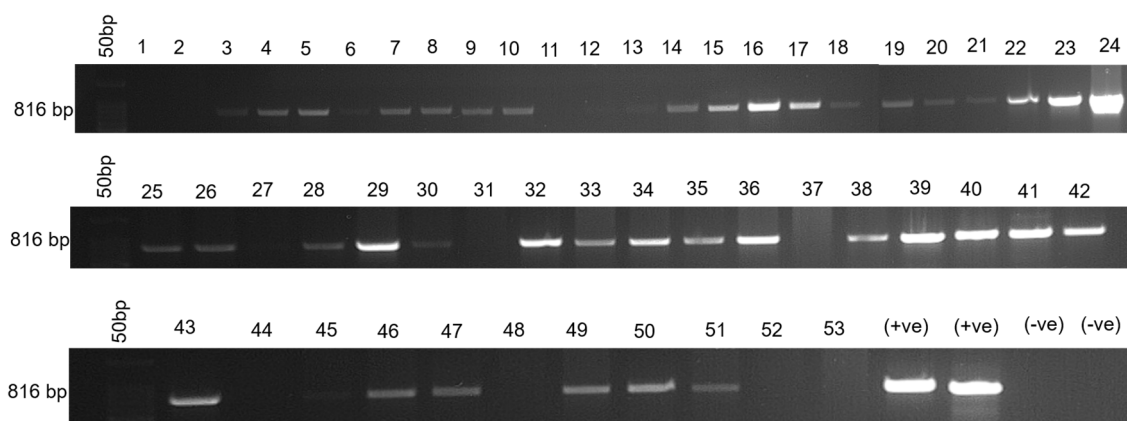

**Supplementary Figure S6. Positive transformants of CRISPR/Cas9 construct at GE<sub>0</sub> generation in tomato cv. AV.** PCR confirmation of CRISPR/Cas9 transformants using the Cas9 primers. (+ve) represents the Cas9 plasmid and untransformed genomic DNA of WT as (–ve) control.

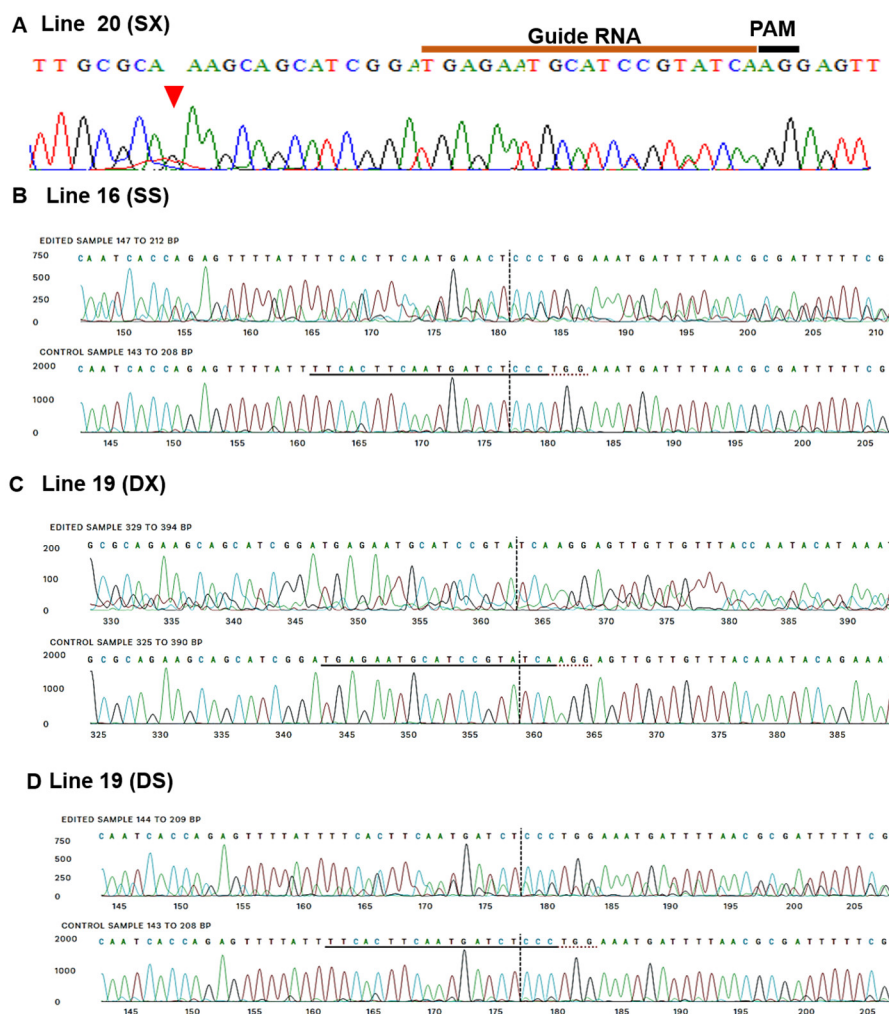

**Supplementary Figure S7. Chromatograms confirming the CRISPR editing events of single and dual gene of tomato cv. AV at GE<sub>0</sub> generation.** Dotted vertical represents cas9 cleavage sites and highlighted marks represents the guide RNA region.

GE0 generation

SX-line 34

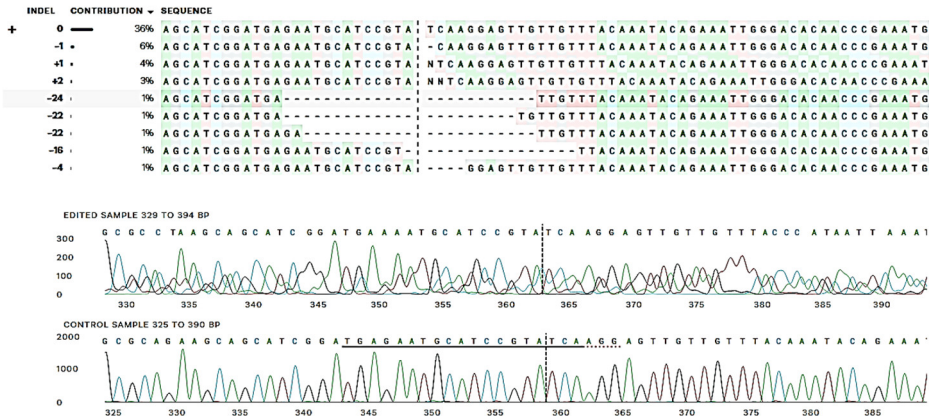

SX-line 40

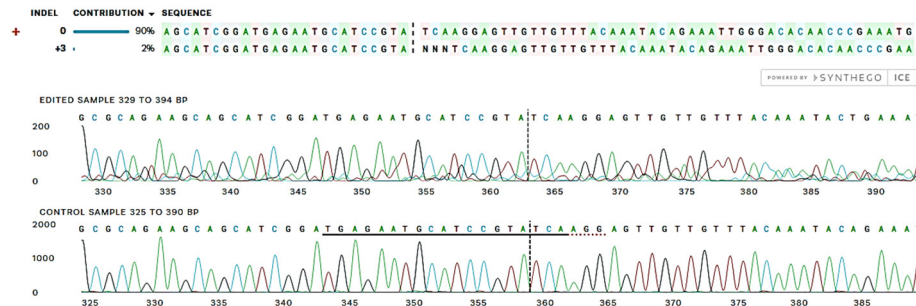

GE0 generation

SS-line 7

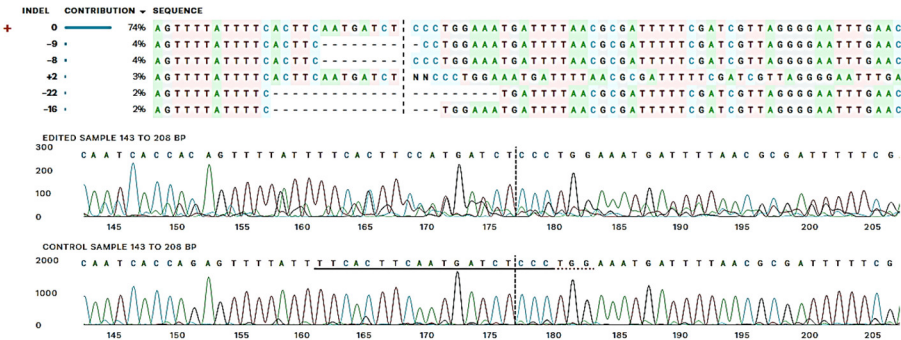

SS-line 23

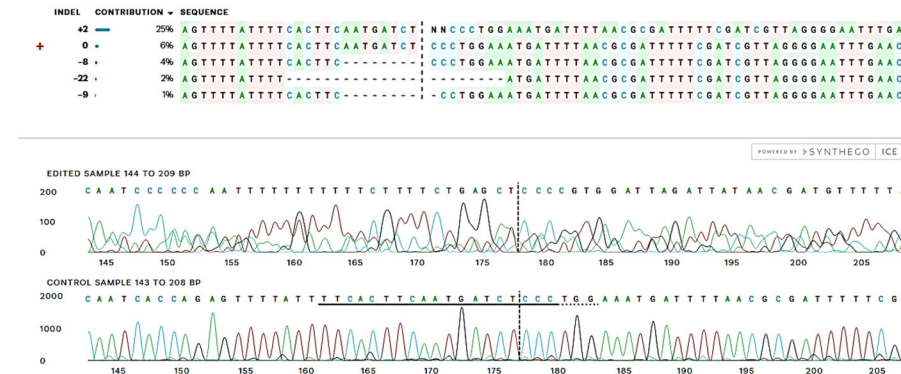



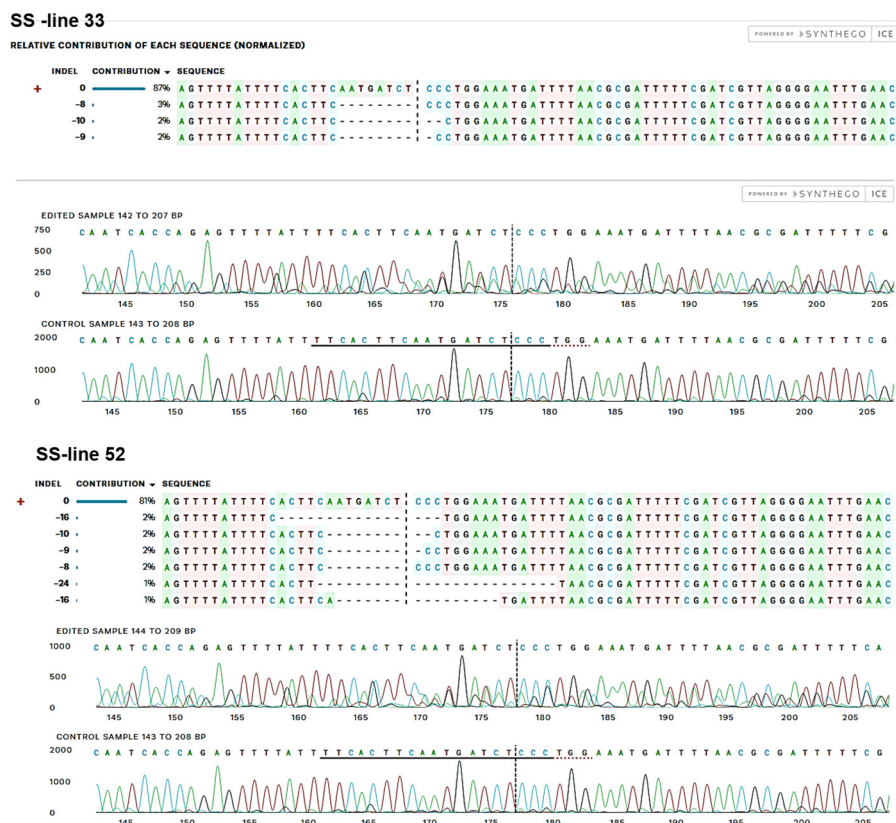

**Supplementary Figure S8. Sanger sequencing and chromatogram confirming the CRISPR editing events of SX and SS of GE<sub>0</sub> generation from tomato cv. AV** Dotted vertical represents cas9 cleavage sites. Dashes represents deletions of nucleotides.

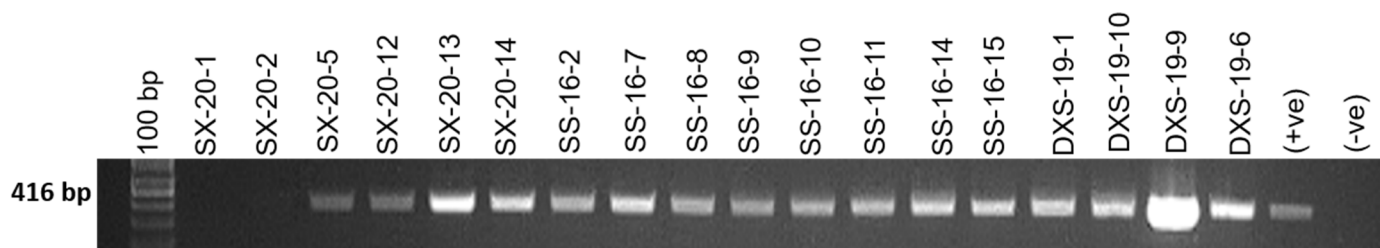

**Supplementary Figure S9. Presence of T-DNA integration in GE<sub>1</sub> progeny.** PCR confirmation by using sets of U6 forward primer and sgRNA scaffold reverse primer. The CRISPR plasmid taken as (+ve) control and genomic DNA of WT untransformed leaves as (-ve) control.



## GE1 generation

### SX -20-12

Allele1: AGCCATGAAATTGATTCCTT---CGCGCAGAAGCAGCATCGGA (insertion and deletion)  
 Allele2: AGCCATGAAATTGATTCCTTCGCGCCGAAGCACCATCCGA (complicated variant)  
 Reference: AGCCATGAAATTGATTCCTT---CGCGCAGAAGCAGCATCGGATGAGAATGCATCCGTATCAAGG

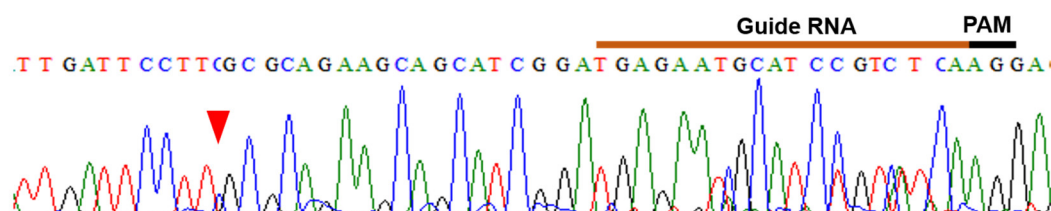

### SX -20-13

Allele1: ATGAAATTGATTCCTTGCGC-GAAGCAGCATCGGAT (deletion)  
 Allele2: ATGAAATTGATTCCTTGCGCA-AAGCAGCATCGGAT (deletion)  
 Reference: ATGAAATTGATTCCTTGCGCAGAAGCAGCATCGGATGAGAATGCATCCGTTCAGGAG

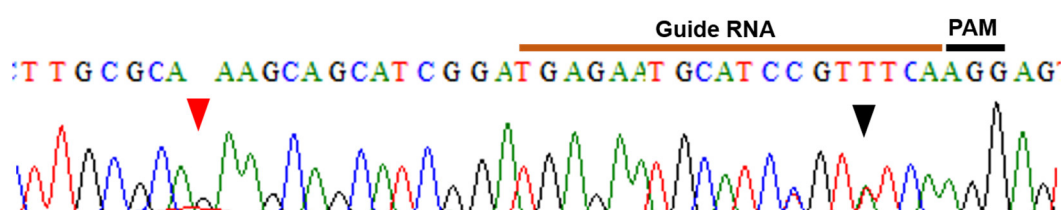

### SX -20-5

Allele1: GCGCAGAAGCAGCATCGGA (WT)  
 Allele2: GCGCTTAAGCAGCATCGGATGAGAATGCATCCGTTCAGG (substitution)  
 Reference: GCGCAGAAGCAGCATCGGATGAGAATGCATCCGTATCAAGG

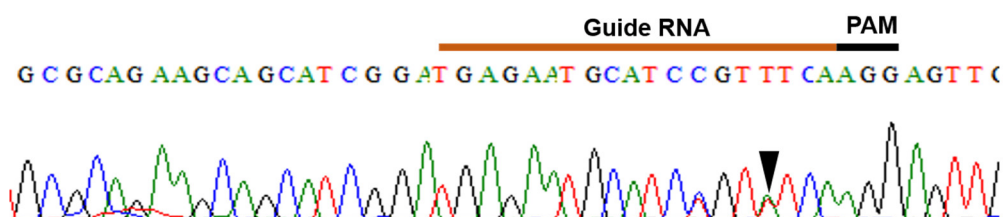

### SX-20-14

Allele1: GCGCAGAAGCAGCATCGGA (WT)  
 Allele2: GCGCTTAAGCAGCATCGGATGAGAATGCATCTGTTCAAGG (substitution)  
 Reference: GCGCAGAAGCAGCATCGGATGAGAATGCATCCGTATCAAGG

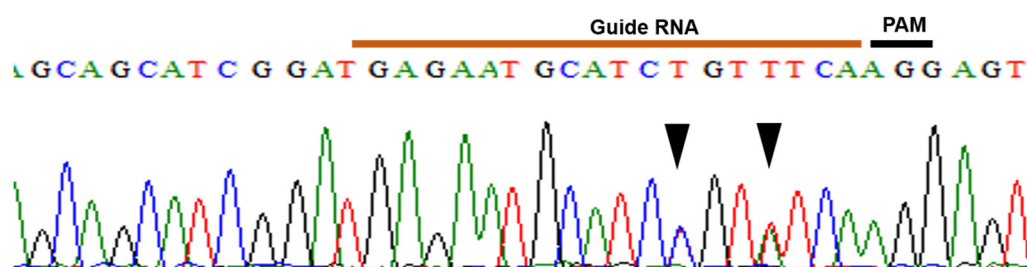

GE1 generation

SS-16-2

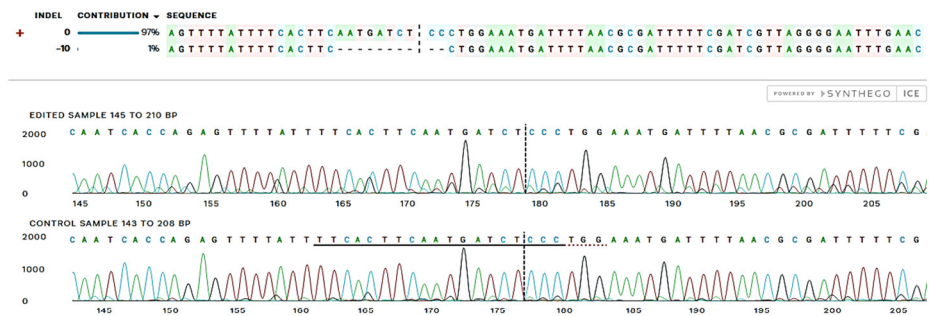

SS-16-7

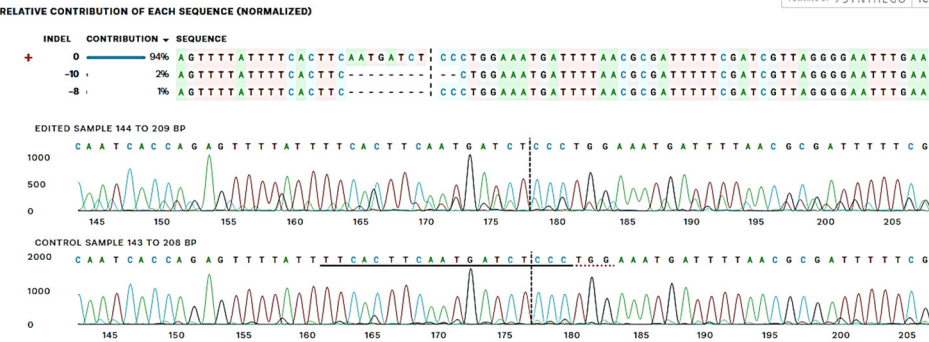

SS-16-8

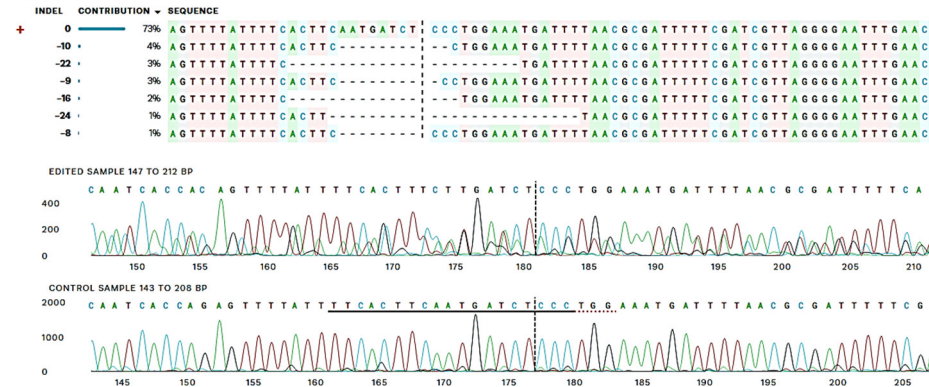

SS-16-9

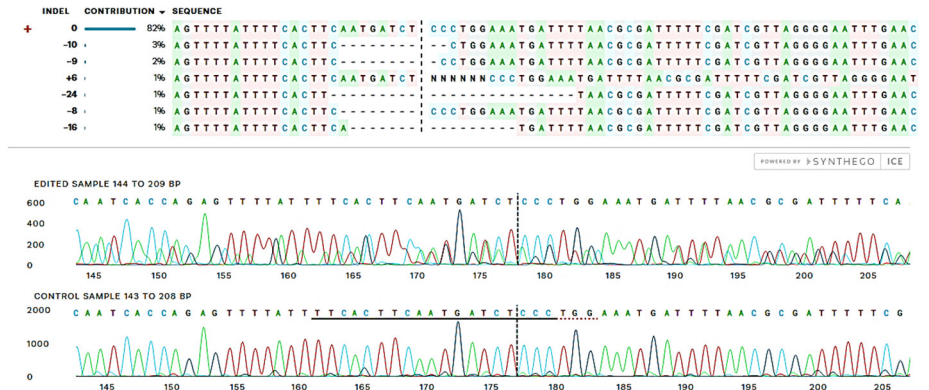

SS-16-10

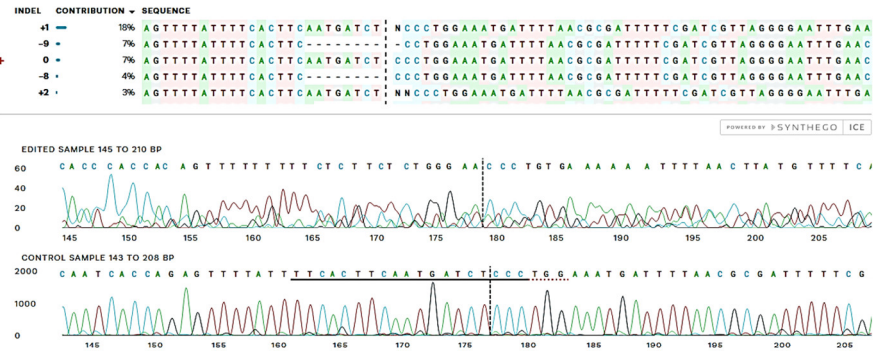

SS-16-11

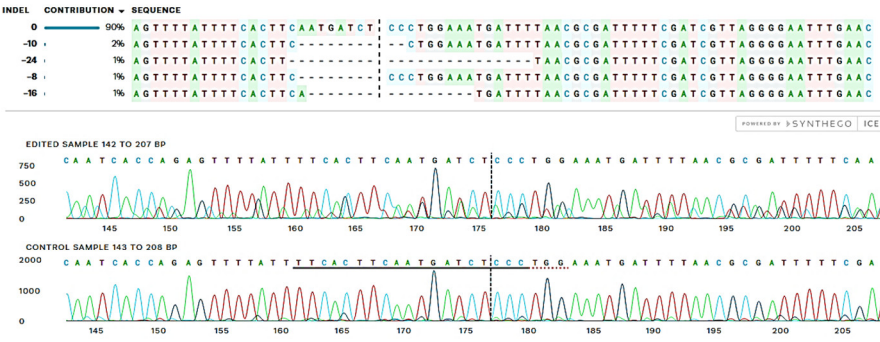

SS-16-14

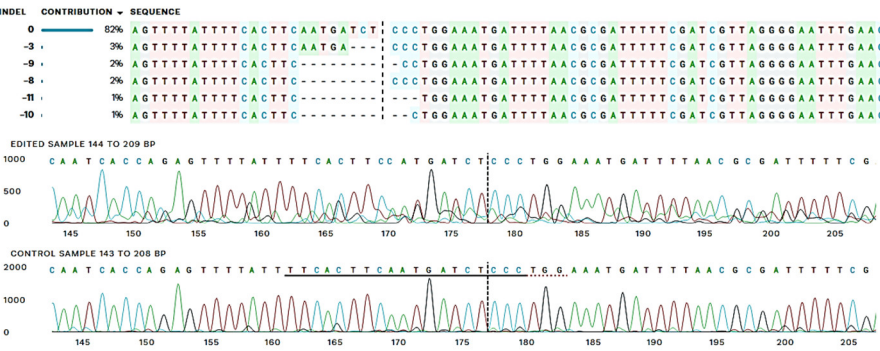

SS-16-15

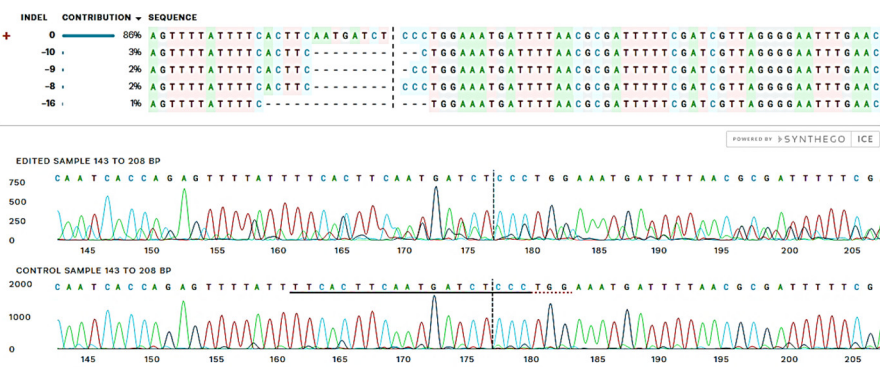



GE1 generation

DX-19-1

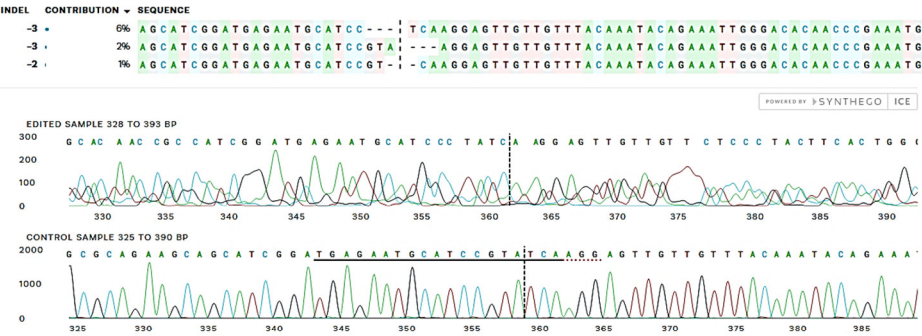

DS-19-1

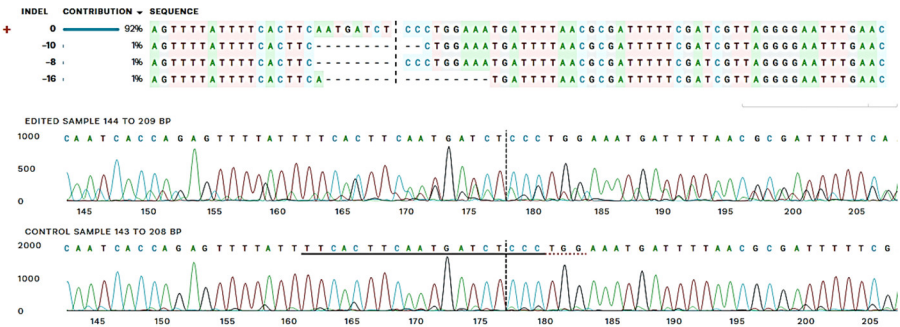

DX-19-5

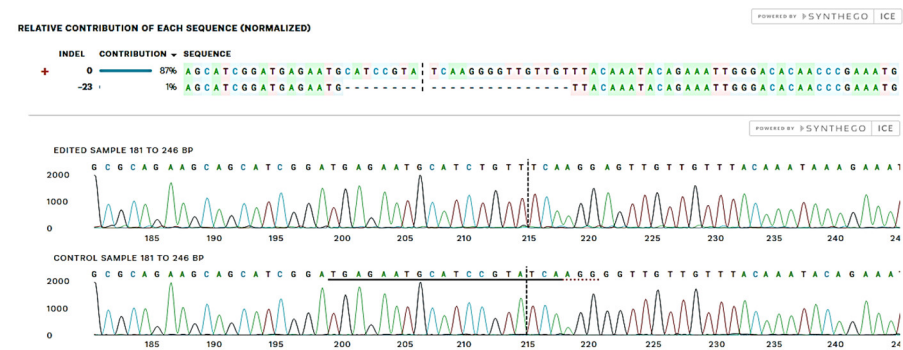

DS-19-5

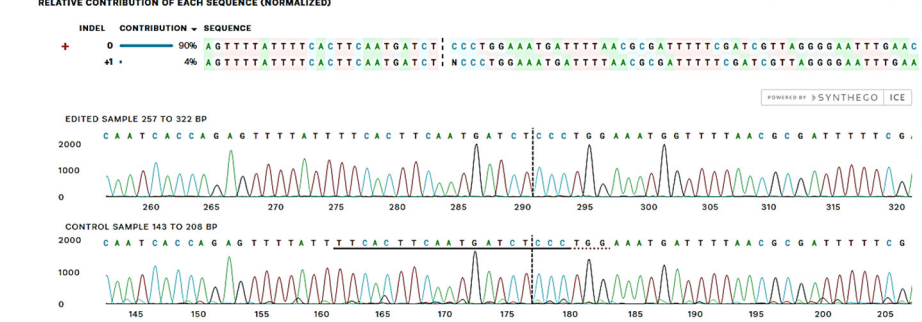



RELATIVE CONTRIBUTION OF EACH SEQUENCE (NORMALIZED)

POWERED BY SYNTHIGO ICE

RELATIVE CONTRIBUTION OF EACH SEQUENCE (NORMALIZED)

POWERED BY SYNTHETIC ICE

**RELATIVE CONTRIBUTION OF EACH SEQUENCE (NORMALIZED)**

| INDEL | CONTRIBUTION ▼ | SEQUENCE |
|-------|----------------|----------|
|-------|----------------|----------|

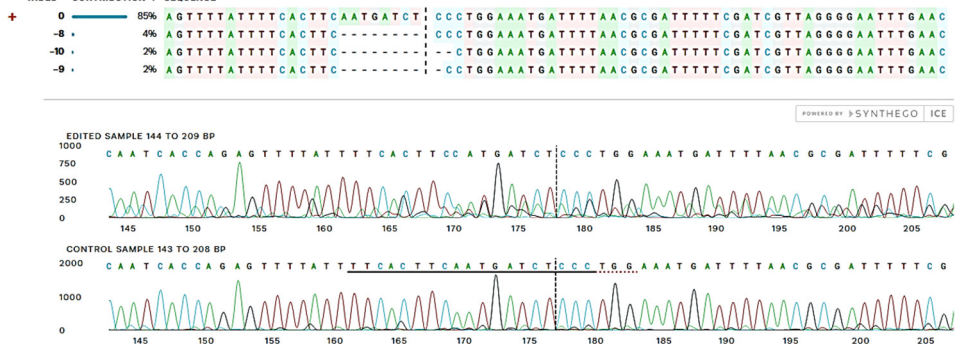

## DX-19-10

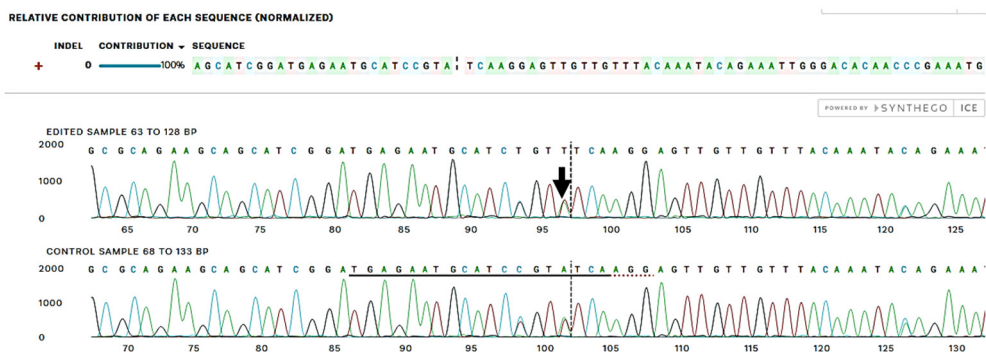

## DS-19-10

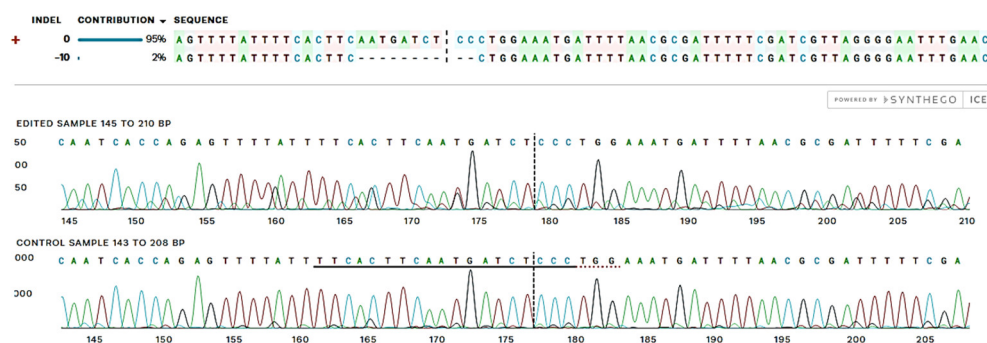

**Supplementary Figure S10. Sanger sequencing and chromatogram confirming the CRISPR editing events of single (SX and SS) and dual gene (DXS) of GE<sub>1</sub> generation from tomato cv. AV. Dotted vertical represents cas9 cleavage sites. Dashes represents deletions of nucleotides.**

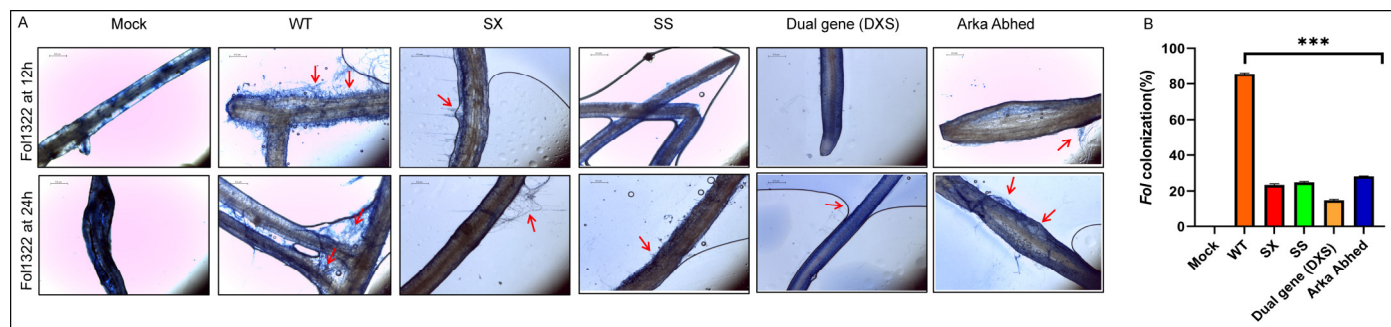

**Supplementary Figure S11. *Fol 1322* colonization in 10-12 days old seedlings of tomato cv. AV at 12 h and 24 h post-inoculation. A. Phenotypic observation of WT and CRISPR edited lines roots inoculated with *Fol 1322* suspension culture. Roots treated with water (mock) were used as a control. B. Quantitative analysis of the intensity of root colonization by *Fol 1322* was observed at 12 h and 24 h after inoculation. The red arrow marked represents the fungal hyphae attached to the root. The colonization intensity was measured as the area of mycelia against the total size of the image. The level of significance difference ( $P^{***}<0.001$ ) was calculated by parametric student t-test using PRISM Graph Pad 9.0. Software. Scale bar 0.2  $\mu$ m.**

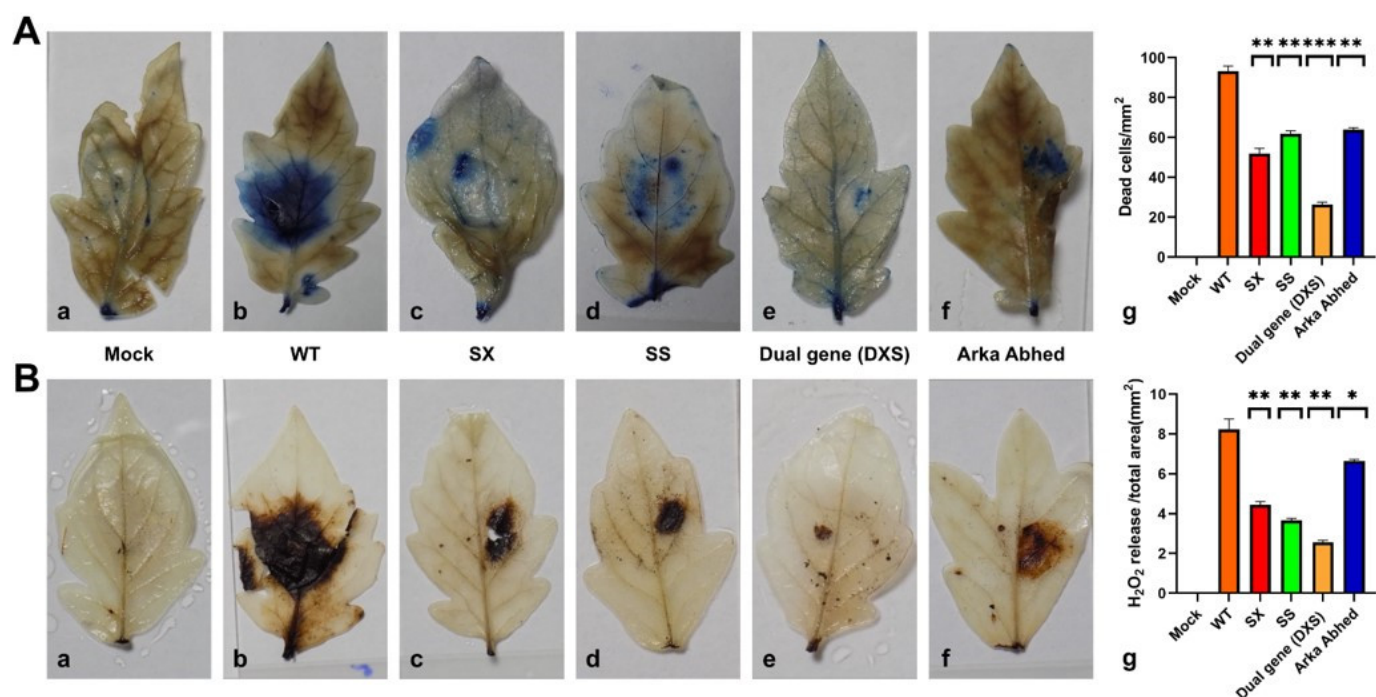

**Supplementary Figure S12. Single and dual-gene CRELS of *XSP10* and *SISAMT* showed reduced necrotic lesions upon *Fol 1322* infection in tomato leaves. A.** Microscopic visualization of *Fol* infected 1 month old leaves of WT and CRELS stained with lactophenol trypan blue (a-f). Quantification of leaf cell death / mm<sup>2</sup> was counted with Image J software (g). **B.** DAB staining of WT and CRELS in 3-PID with *Fol 1322* (a-f). The H<sub>2</sub>O<sub>2</sub> release / total area (mm<sup>2</sup>) was measured with Image J software (g). Data were collected from three independent biological replicates, and 3 leaves were used in each biological replicate. The average lesion areas are expressed as means ± standard errors (n = 3). All the data were statistically analyzed. Asterisks indicate significant differences compared to the control (Student's t-test, \*P < 0.05, \*\*P < 0.01, \*\*\*P < 0.001).



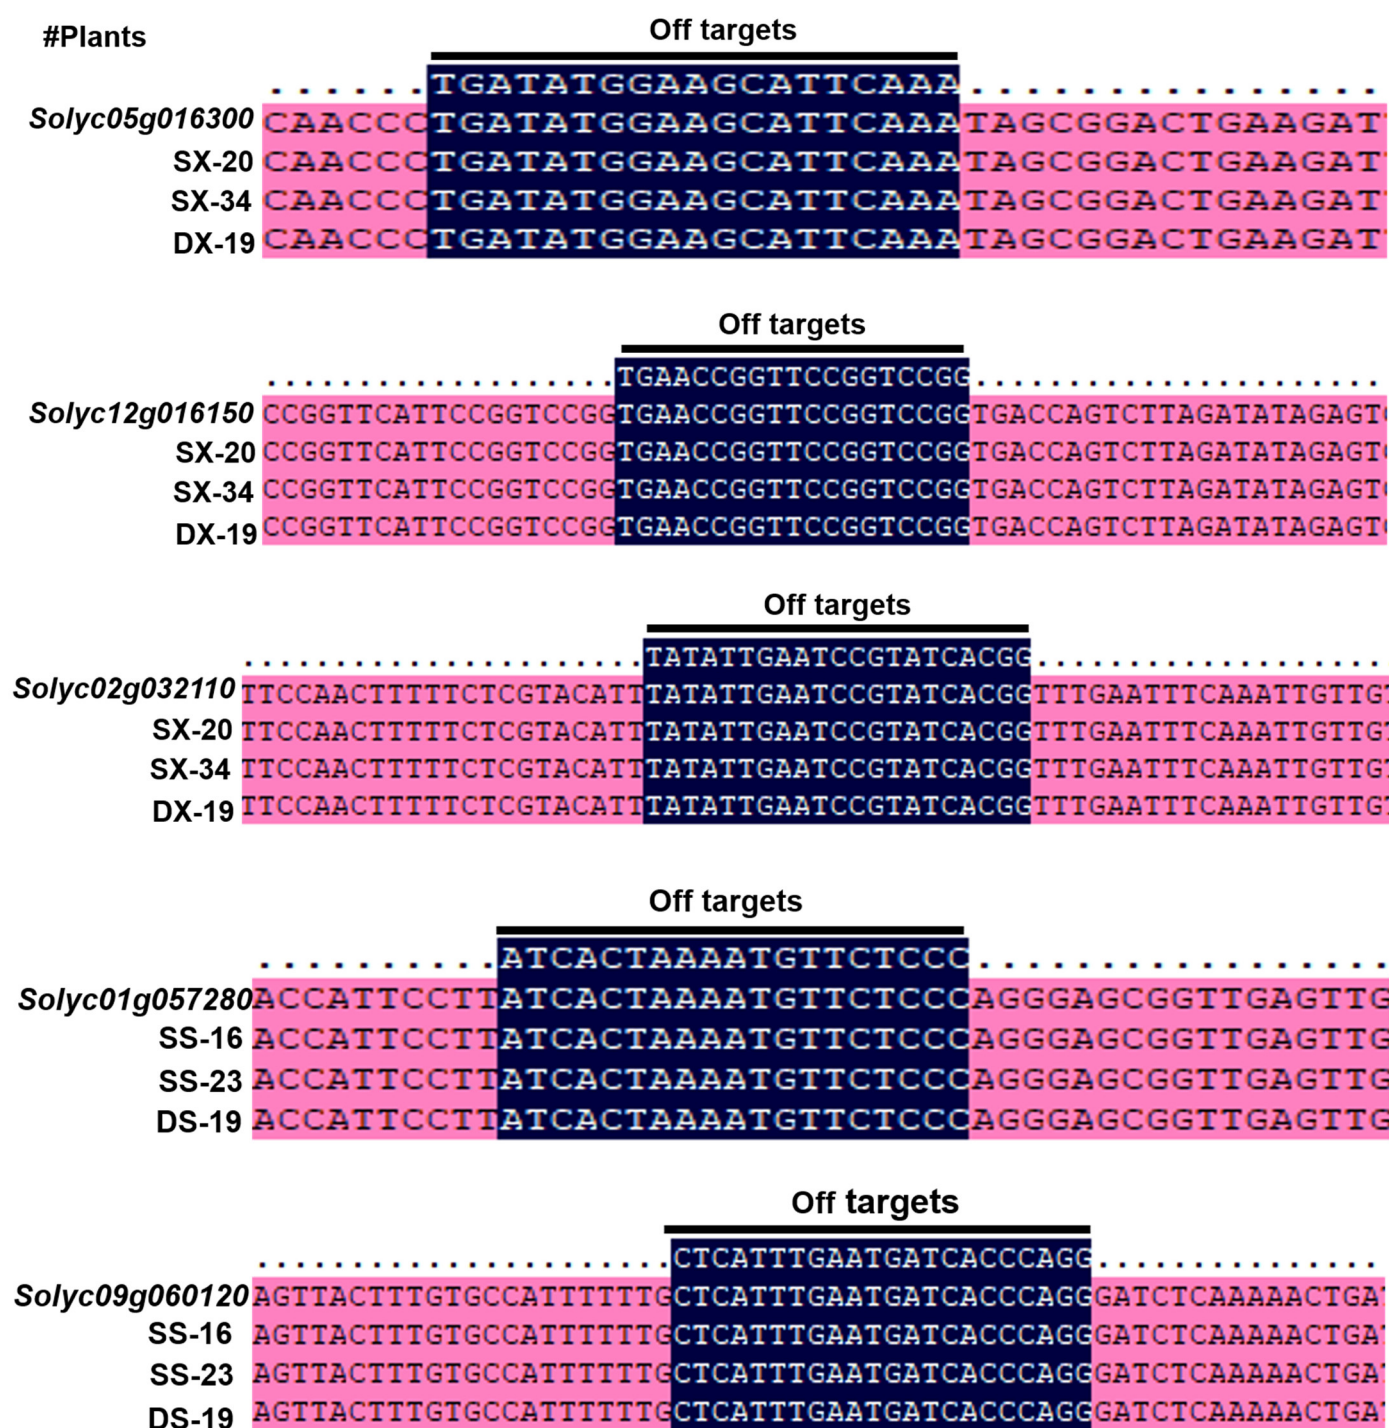

**Supplementary Figure S13. Potential off-target sites generated in GE<sub>0</sub> CRELS by Sanger sequencing method.** Sequences of CRELS (SX-20, SX-34, SS-16, SS-23, DXS-19) were taken for potential off-target analysis and aligned with reference WT by DNAMAN.10 software.



Supplementary Table S1. Primers used in this study.

| Sl. No. | Gene name                                     | Purpose    | Primers (5' to 3')      |
|---------|-----------------------------------------------|------------|-------------------------|
| 1.      | XSP10 PCR Fwd                                 | PCR        | TAGGATTTGTTGTGCTACTGGC  |
| 2.      | XSP10 PCR Rev                                 | PCR        | ATGGTTATCGCAACTTCAGGAT  |
| 3.      | SISAMT PCR Fwd                                | PCR        | GTGATTCTCATGACAAAGCCAA  |
| 4.      | SISAMT PCR Rev                                | PCR        | TCAAATTTTGTTCAAATTCCCC  |
| 5.      | M13 (-40) Fwd                                 | Sequencing | GGATGTTTTCCCAGTCACGACG  |
| 6.      | M13 Rev                                       | Sequencing | GCCAGGAAACAGCTATGACC    |
| 7.      | sgRNA SAMT Fwd                                | CRISPR PCR | TTCACTTCAATGATCTCCC     |
| 8.      | sgRNA XSP10 Fwd                               | CRISPR PCR | TGAGAATGCATCCGTATCA     |
| 9.      | Cas9 Fwd                                      | CRISPR PCR | CGGAACAACTCTGTTGGATGGGC |
| 10.     | Cas9 Rev                                      | CRISPR PCR | CCGATCTGAGCGAGGAGGTTAT  |
| 11.     | Off-target_1_Fwd<br>( <i>Solyc05g016300</i> ) | CRISPR PCR | GGGCGATGAAGAACTGAAG     |
| 12.     | Off-target_1_Rev<br>( <i>Solyc05g016300</i> ) | CRISPR PCR | TCATTGTAAGCAGCCTCCAC    |
| 13.     | Off-target_2_Fwd<br>( <i>Solyc12g016150</i> ) | CRISPR PCR | GTCCTGTTCCATCCCGGTCC    |
| 14.     | Off-target_2_Rev<br>( <i>Solyc12g016150</i> ) | CRISPR PCR | AAATACTATTCAAATGTAGTTCG |
| 15.     | Off-target_3_Fwd<br>( <i>Solyc02g032110</i> ) | CRISPR PCR | GGCAAACATTCATAACTA      |
| 16.     | Off-target_3_Rev<br>( <i>Solyc02g032110</i> ) | CRISPR PCR | ACAAACTGGTTAAATCTAG     |
| 17.     | Off-target_4_Fwd<br>( <i>Solyc01g057280</i> ) | CRISPR PCR | GGGCGATGAAGAACTGAAG     |
| 18.     | Off-target_4_Rev<br>( <i>Solyc01g057280</i> ) | CRISPR PCR | CCCATTGACCATGAAGTGTG    |
| 19.     | Off-target_5_Fwd<br>( <i>Solyc09g060120</i> ) | CRISPR PCR | GGATATAGAGTGAATTAAT     |
| 20.     | Off-target_5_Rev<br>( <i>Solyc09g060120</i> ) | CRISPR PCR | AACGGGAATTTTCAAACCTTCG  |
| 21.     | U6 promoter Fwd                               | CRISPR PCR | AGAAATCTCAAAATTCGGGCAGA |
| 22.     | sgRNA scaffold Rev                            | CRISPR PCR | CCGACTCGGTGCCACTTTT     |

Supplementary Table S2. Summary of sgRNA design of target genes *XSP10* and *SISAMT* along with off-target details.

| On-target ( <i>XSP10</i> )       |               |                         |     |          |           |                                                                                                                                                                                                                                          |                        |               |
|----------------------------------|---------------|-------------------------|-----|----------|-----------|------------------------------------------------------------------------------------------------------------------------------------------------------------------------------------------------------------------------------------------|------------------------|---------------|
| Coordinates                      | Mismatch<br>h | sgRNA<br>sequence       | PAM | Distance | Gene name | Gene ID                                                                                                                                                                                                                                  | Efficacy               | Specificity   |
| SL2.50ch03:51687<br>162-51687184 | 0             | TGAGAATGC<br>ATCCGTATCA | AGG | 0        | Exon      | Xylem sap protein 10; Protease inhibitor/seed storage/lipid transfer protein family protein (AHRD V1 **** D7LUP2_ARALY); contains Interpro domain(s) IPR003612 Plant lipid transfer protein/seed storage/trypsin-alpha amylase inhibitor | Solyc03g07988<br>0.2.1 | 0.66<br>98.83 |
| Off-targets                      |               |                         |     |          |           |                                                                                                                                                                                                                                          |                        |               |
| SL2.50ch02:27537<br>596-27537618 | 4             | TTATATTGAA<br>TCCGTATCA | CGG | 14834    | -         | Unknown Protein (AHRD V1)                                                                                                                                                                                                                | Solyc02g03211<br>0.1.1 |               |
| SL2.50ch12:62238<br>54-6223876   | 4             | TGATATTGG<br>ACCCGTATCA | CGG | 9236     | -         | MADS-box protein (Fragment) (AHRD V1 *- *- Q84MI1_DRANE); contains Interpro domain(s) IPR002100 Transcription factor, MADS-box                                                                                                           | Solyc12g01615<br>0.1.1 |               |
| SL2.50ch05:15474<br>733-15474755 | 4             | TTTGAATGCT<br>TCCATATCA | GGG | 466      | -         | Lysine-specific histone demethylase 1 homolog 3 (AHRD V1 ***- LDL3_ARATH)                                                                                                                                                                | Solyc05g01630<br>0.1.1 |               |
| On-target ( <i>SISAMT</i> )      |               |                         |     |          |           |                                                                                                                                                                                                                                          |                        |               |
| Coordinates                      | Mismatch<br>h | sgRNA<br>sequence       | PAM | Distance | Gene name | Gene ID                                                                                                                                                                                                                                  | Efficacy               | Specificity   |

|                                  |   |                                        |     |   |      |                                                                                                                           |                        |      |     |
|----------------------------------|---|----------------------------------------|-----|---|------|---------------------------------------------------------------------------------------------------------------------------|------------------------|------|-----|
| SL2.50ch09:70803<br>857-70803879 | 0 | <u>T</u> TCACTTCAA<br><u>TGATCTCCC</u> | TGG | 0 | Exon | Salicylic acid carboxyl<br>methyltransferase (AHRD V1 ****<br>C3VIX6_9ASTR); contains Interpro<br>domain(s) IPR005299 SAM | Solyc09g09155<br>0.2.1 | 0.68 | 100 |
|----------------------------------|---|----------------------------------------|-----|---|------|---------------------------------------------------------------------------------------------------------------------------|------------------------|------|-----|

**Off targets**

|                                  |   |                                                |     |       |   |                                                                                                                                            |                        |  |  |
|----------------------------------|---|------------------------------------------------|-----|-------|---|--------------------------------------------------------------------------------------------------------------------------------------------|------------------------|--|--|
| SL2.50ch01:60328<br>478-60328500 | 4 | <u>A</u> TCACT <u>AAAA</u><br><u>TGTTCTCCC</u> | AGG | 1243  | - | 26S proteasome non-ATPase<br>regulatory subunit 9 (AHRD V1 ***-<br>B4FPX0_MAIZE); contains Interpro<br>domain(s) IPR001478<br>PDZ/DHR/GLGF | Solyc01g05728<br>0.1.1 |  |  |
| SL2.50ch09:57641<br>187-57641209 | 4 | <u>C</u> TCAT <u>TTGAA</u><br><u>TGATCAGCC</u> | AGG | 22079 | - | Transducin family protein (AHRD<br>V1 ***- D7KAM3_ARALY);<br>contains Interpro domain(s)<br>IPR011046 WD40 repeat-like                     | Solyc09g06012<br>0.1.1 |  |  |

**Supplementary Table S3.** Data on measurement of lesion size upon *Fol 1322* infection in WT and single gene CRISPR edited constructs of (SX) and (SS) using Image J software.

| PID 1       |               |       |         |        |     |     |
|-------------|---------------|-------|---------|--------|-----|-----|
| Target gene | No. of leaves | Area  | mean    | stdev  | Min | max |
| (WT)        | 1             | 0.325 | 100.5   | 10.967 | 55  | 129 |
|             | 2             | 0.224 | 99.714  | 11.305 | 45  | 129 |
|             | 3             | 0.222 | 104.11  | 6.251  | 89  | 129 |
|             |               |       |         |        |     |     |
| (SX)        | 1             | 0.223 | 88.086  | 27.461 | 34  | 138 |
|             | 2             | 0.21  | 77.857  | 21.671 | 39  | 142 |
|             | 3             | 0.211 | 91.587  | 29.474 | 25  | 125 |
|             |               |       |         |        |     |     |
| (SS)        | 1             | 0.226 | 86.903  | 20.357 | 24  | 126 |
|             | 2             | 0.25  | 71.732  | 28.077 | 18  | 126 |
|             | 3             | 0.22  | 77.015  | 26.22  | 18  | 126 |
| PID 2       |               |       |         |        |     |     |
| (WT)        | 1             | 0.74  | 121.968 | 17.573 | 80  | 153 |
|             | 2             | 0.77  | 114.909 | 9.677  | 82  | 140 |
|             | 3             | 0.67  | 132.997 | 14.299 | 88  | 164 |
|             |               |       |         |        |     |     |
| (SX)        | 1             | 0.566 | 88.434  | 13.485 | 39  | 125 |
|             | 2             | 0.536 | 87.015  | 16.677 | 32  | 125 |
|             | 3             | 0.552 | 92.545  | 8.623  | 72  | 122 |
|             |               |       |         |        |     |     |
| (SS)        | 1             | 0.532 | 77.534  | 13.895 | 35  | 108 |
|             | 2             | 0.521 | 77.823  | 17.16  | 20  | 108 |
|             | 3             | 0.572 | 76.284  | 17.66  | 17  | 108 |
| PID 3       |               |       |         |        |     |     |
| (WT)        | 1             | 1.912 | 130.845 | 19.283 | 78  | 165 |
|             | 2             | 1.971 | 142.385 | 12.748 | 105 | 165 |
|             | 3             | 2.312 | 139.794 | 11.967 | 107 | 165 |

|       |   |       |         |        |    |     |
|-------|---|-------|---------|--------|----|-----|
| (SX)  | 1 | 1.823 | 100.763 | 25.339 | 42 | 255 |
|       | 2 | 1.811 | 106.5   | 21.914 | 57 | 239 |
|       | 3 | 1.888 | 104.887 | 11.868 | 68 | 175 |
| ( SS) | 1 | 1.78  | 82.378  | 36.25  | 20 | 144 |
|       | 2 | 1.672 | 89.099  | 36.217 | 20 | 144 |
|       | 3 | 1.88  | 82.144  | 36.978 | 20 | 144 |

**Supplementary Table S4.** Data on measurement of lesion size upon *Fol 1322* infection in WT and dual gene (DXS) constructs using Image J software.

| PID 1 |               |         |         |        |     |     |          |          |      |      |      |       |        |       |         |       |            |       |       |          |
|-------|---------------|---------|---------|--------|-----|-----|----------|----------|------|------|------|-------|--------|-------|---------|-------|------------|-------|-------|----------|
|       | No. of Leaves | Area    | Mean    | StdDEV | Min | Max | XM       | YM       | Peri | BX   | BY   | Width | Height | Circ. | IntDen  | %Area | Raw IntDen | AR    | Round | Solidity |
| WT    | 1             | 0.30091 | 98.395  | 12.762 | 72  | 173 | 360.496  | 1765.156 | 608  | 288  | 1688 | 144   | 160    | 0.783 | 2267023 | 0     | 2267023    | 1.111 | 0.9   | 1        |
|       | 2             | 0.4206  | 96.698  | 22.609 | 40  | 156 | 920.596  | 1744.512 | 608  | 832  | 1672 | 160   | 144    | 0.783 | 2227933 | 0     | 2227933    | 1.111 | 0.9   | 1        |
|       | 3             | 0.3717  | 95.877  | 26.801 | 38  | 157 | 1382.552 | 1762.171 | 688  | 1304 | 1672 | 160   | 184    | 0.782 | 2822620 | 0     | 2822620    | 1.15  | 0.87  | 1        |
|       | 4             | 0.341   | 120.763 | 20.855 | 76  | 167 | 1949.673 | 1747.303 | 560  | 1864 | 1688 | 160   | 120    | 0.769 | 2318641 | 0     | 2318641    | 1.333 | 0.75  | 1        |
|       | 5             | 0.312   | 99.904  | 19.356 | 56  | 146 | 2376.407 | 1827.686 | 704  | 2320 | 1704 | 120   | 232    | 0.706 | 2781334 | 0     | 2781334    | 1.933 | 0.517 | 1        |
| DXS   | 1             | 0.28395 | 67.091  | 14.561 | 31  | 116 | 2287.117 | 2606.119 | 540  | 2214 | 2544 | 144   | 126    | 0.782 | 1217295 | 0     | 1217295    | 1.143 | 0.875 | 1        |
|       | 2             | 0.25877 | 74.206  | 20.989 | 22  | 159 | 2587.944 | 2581.13  | 600  | 2514 | 2508 | 156   | 144    | 0.784 | 1666957 | 0     | 1666957    | 1.083 | 0.923 | 1        |
|       | 3             | 1.82    | 68.717  | 13.137 | 35  | 116 | 2320.368 | 2614.904 | 540  | 2250 | 2550 | 138   | 132    | 0.785 | 1251741 | 0     | 1251741    | 1.045 | 0.957 | 1        |
|       | 4             | 0.211   | 69.752  | 23.1   | 26  | 163 | 2213.057 | 2625.754 | 540  | 2148 | 2556 | 138   | 132    | 0.785 | 1270602 | 0     | 1270602    | 1.045 | 0.957 | 1        |
|       | 5             | 0.231   | 75.238  | 16.451 | 33  | 168 | 2355.083 | 2722.77  | 540  | 2280 | 2658 | 144   | 126    | 0.782 | 1365125 | 0     | 1365125    | 1.143 | 0.875 | 1        |
| PID2  |               |         |         |        |     |     |          |          |      |      |      |       |        |       |         |       |            |       |       |          |
| WT    | 1             | 0.723   | 108.864 | 22.41  | 61  | 189 | 1713.981 | 2784.06  | 1188 | 1554 | 2646 | 336   | 258    | 0.772 | 9437171 | 0     | 9437171    | 1.302 | 0.768 | 1        |
|       | 2             | 0.7967  | 104.967 | 24.73  | 35  | 187 | 1730.951 | 2194.25  | 1080 | 1602 | 2064 | 270   | 270    | 0.785 | 7652118 | 0     | 7652118    | 1     | 1     | 1        |
|       | 3             | 0.7045  | 106.096 | 27.48  | 27  | 170 | 1703.101 | 1725.885 | 828  | 1602 | 1632 | 210   | 204    | 0.785 | 4545166 | 0     | 4545166    | 1.029 | 0.971 | 1        |
|       | 4             | 0.712   | 105.809 | 12.263 | 68  | 170 | 1710.859 | 2743.684 | 780  | 1614 | 2646 | 198   | 192    | 0.785 | 4022427 | 0     | 4022427    | 1.031 | 0.97  | 1        |
|       | 5             | 0.721   | 107.218 | 10.801 | 69  | 149 | 1692.202 | 2749.69  | 720  | 1596 | 2664 | 192   | 168    | 0.782 | 3458422 | 0     | 3458422    | 1.143 | 0.875 | 1        |
| DXS   | 1             | 0.5063  | 78.063  | 21.929 | 33  | 181 | 2370.585 | 2629.935 | 684  | 2268 | 2550 | 186   | 156    | 0.779 | 2265066 | 0     | 2265066    | 1.192 | 0.839 | 1        |
|       | 2             | 0.552   | 66.742  | 13.893 | 31  | 116 | 2299.671 | 2611.435 | 588  | 2220 | 2544 | 156   | 138    | 0.782 | 1436818 | 0     | 1436818    | 1.13  | 0.885 | 1        |
|       | 3             | 0.5024  | 78.317  | 31.013 | 37  | 179 | 2690.507 | 2550.137 | 624  | 2604 | 2484 | 162   | 150    | 0.784 | 1903111 | 0     | 1903111    | 1.08  | 0.926 | 1        |
|       | 4             | 0.542   | 72.264  | 13.595 | 34  | 121 | 2349.03  | 2621.811 | 552  | 2274 | 2556 | 144   | 132    | 0.784 | 1373589 | 0     | 1373589    | 1.091 | 0.917 | 1        |
|       | 5             | 0.412   | 68.037  | 13.161 | 33  | 116 | 2322.995 | 2634.563 | 468  | 2262 | 2580 | 120   | 114    | 0.785 | 930742  | 0     | 930742     | 1.053 | 0.95  | 1        |
| PID3  |               |         |         |        |     |     |          |          |      |      |      |       |        |       |         |       |            |       |       |          |
| WT    | 1             | 1.23    | 68.518  | 25.593 | 16  | 174 | 1566.832 | 2617.009 | 1380 | 1332 | 2508 | 480   | 210    | 0.665 | 6906645 | 0     | 6906645    | 2.286 | 0.438 | 1        |
|       | 2             | 1.2967  | 115.292 | 33.031 | 46  | 162 | 1640.225 | 2291.915 | 480  | 1584 | 2238 | 120   | 120    | 0.785 | 1660206 | 0     | 1660206    | 1     | 1     | 1        |
|       | 3             | 1.2045  | 100.018 | 14.423 | 53  | 141 | 1686.527 | 1614.504 | 492  | 1620 | 1560 | 132   | 114    | 0.781 | 1505065 | 0     | 1505065    | 1.158 | 0.864 | 1        |
|       | 4             | 1.112   | 128.784 | 18.675 | 74  | 169 | 1631.548 | 1271.504 | 432  | 1584 | 1212 | 96    | 120    | 0.776 | 1483593 | 0     | 1483593    | 1.25  | 0.8   | 1        |
|       | 5             | 1.221   | 146.913 | 27.546 | 82  | 203 | 1527.593 | 556.763  | 552  | 1458 | 498  | 150   | 126    | 0.779 | 2776656 | 0     | 2776656    | 1.19  | 0.84  | 1        |
| DXS   | 1             | 0.4063  | 80.882  | 24.672 | 32  | 154 | 1864.787 | 2724.063 | 876  | 1740 | 2616 | 228   | 210    | 0.784 | 3872637 | 0     | 3872637    | 1.086 | 0.921 | 1        |
|       | 2             | 0.452   | 79.302  | 30.207 | 14  | 182 | 1891.588 | 2728.946 | 1416 | 1680 | 2562 | 408   | 300    | 0.767 | 9706561 | 0     | 9706561    | 1.36  | 0.735 | 1        |
|       | 3             | 0.3024  | 76.989  | 24.627 | 29  | 154 | 1854.833 | 2714.572 | 948  | 1722 | 2592 | 240   | 234    | 0.785 | 4323711 | 0     | 4323711    | 1.026 | 0.975 | 1        |
|       | 4             | 0.412   | 82.45   | 17.246 | 32  | 147 | 1979.214 | 1580.282 | 744  | 1878 | 1494 | 198   | 174    | 0.782 | 2840563 | 0     | 2840563    | 1.138 | 0.879 | 1        |
|       | 5             | 0.4212  | 66.978  | 21.441 | 26  | 148 | 1812.105 | 2670.859 | 660  | 1722 | 2580 | 162   | 168    | 0.785 | 1822865 | 0     | 1822865    | 1.037 | 0.964 | 1        |
| PID4  |               |         |         |        |     |     |          |          |      |      |      |       |        |       |         |       |            |       |       |          |
| WT    | 1             | 1.432   | 130.59  | 17.968 | 82  | 206 | 1792.989 | 349.374  | 444  | 1740 | 294  | 108   | 114    | 0.785 | 2037992 | 0     | 2037992    | 1.056 | 0.947 | 1        |
|       | 2             | 1.4967  | 166.57  | 13.575 | 110 | 213 | 1775.427 | 352.752  | 408  | 1722 | 306  | 108   | 96     | 0.783 | 1782159 | 0     | 1782159    | 1.125 | 0.889 | 1        |
|       | 3             | 1.4045  | 169.58  | 11.439 | 142 | 207 | 1778.775 | 353.128  | 348  | 1734 | 312  | 90    | 84     | 0.784 | 1296440 | 0     | 1296440    | 1.071 | 0.933 | 1        |
|       | 4             | 1.321   | 170.93  | 15.581 | 91  | 213 | 1780.947 | 349.685  | 444  | 1722 | 300  | 120   | 102    | 0.78  | 2090719 | 0     | 2090719    | 1.176 | 0.85  | 1        |
|       | 5             | 1.422   | 162.156 | 25.686 | 79  | 213 | 1788.333 | 356.419  | 516  | 1722 | 300  | 138   | 120    | 0.782 | 2653783 | 0     | 2653783    | 1.15  | 0.87  | 1        |
| DXS   | 1             | 0.5063  | 51.421  | 11.433 | 52  | 130 | 1825.599 | 2376.727 | 504  | 1758 | 2316 | 132   | 120    | 0.784 | 1444144 | 0     | 1444144    | 1.1   | 0.909 | 1        |
|       | 2             | 0.552   | 47.137  | 25     | 19  | 172 | 2045.225 | 1591.524 | 804  | 1938 | 1506 | 222   | 180    | 0.777 | 3325339 | 0     | 3325339    | 1.233 | 0.811 | 1        |
|       | 3             | 0.5024  | 53.614  | 15.192 | 25  | 144 | 1788.872 | 1545.373 | 396  | 1740 | 1500 | 102   | 96     | 0.785 | 779997  | 0     | 779997     | 1.062 | 0.941 | 1        |
|       | 4             | 0.437   | 56.57   | 12.561 | 59  | 127 | 1917.289 | 1668.014 | 456  | 1854 | 1614 | 126   | 102    | 0.777 | 1173468 | 0     | 1173468    | 1.235 | 0.81  | 1        |
|       | 5             | 0.469   | 54.615  | 13.527 | 40  | 162 | 1722.728 | 1549.828 | 540  | 1650 | 1488 | 144   | 126    | 0.782 | 1512409 | 0     | 1512409    | 1.143 | 0.875 | 1        |



| t-test: Paired Two Sample for Means | PID3        |             |
|-------------------------------------|-------------|-------------|
|                                     | Variable 1  | Variable 2  |
| Mean                                | 159.9798    | 108.8724    |
| Variance                            | 281.3738617 | 1035.933612 |
| Observations                        | 5           | 5           |
| Pearson Correlation                 | 0.523200526 |             |
| Hypothesized Mean Difference        | 0           |             |
| df                                  | 4           |             |
| t Stat                              | 4.166344386 |             |
| P(T<=t) one-tail                    | 0.007036365 |             |
| t Critical one-tail                 | 2.131846786 |             |
| P(T<=t) two-tail                    | 0.01407273  | **          |
| t Critical two-tail                 | 2.776445105 |             |

| t-test: Paired Two Sample for Means | PID 4        |             |
|-------------------------------------|--------------|-------------|
|                                     | Variable 1   | Variable 2  |
|                                     | 68.518       | 80.882      |
| Mean                                | 122.75175    | 76.42975    |
| Variance                            | 397.5417669  | 44.71385625 |
| Observations                        | 4            | 4           |
| Pearson Correlation                 | -0.56551063  |             |
| Hypothesized Mean Difference        | 0            |             |
| df                                  | 3            |             |
| t Stat                              | 3.804274871  |             |
| P(T<=t) one-tail                    | 0.015955888  |             |
| t Critical one-tail                 | 2.353363435  |             |
| P(T<=t) two-tail                    | 0.0031911775 | ***         |
| t Critical two-tail                 | 3.182446305  |             |

**Supplementary Table S5.** Statistical data analysis of root colonization in 10-12 days old seedlings of tomato cultivar Arka Vikas using Image J software.

| WT                       |   |      |         |        |     |     |
|--------------------------|---|------|---------|--------|-----|-----|
|                          |   | Area | Mean    | StDEV  | Min | Max |
| Total area               | 1 | 8940 | 208.138 | 66.178 | 15  | 255 |
|                          | 2 | 7980 | 204.184 | 57.825 | 43  | 253 |
|                          | 3 | 4960 | 207.486 | 55.978 | 43  | 252 |
| <i>Fol</i> infected area | 1 | 360  | 120.639 | 61.234 | 45  | 249 |

|                          |   |       |         |        |     |     |
|--------------------------|---|-------|---------|--------|-----|-----|
|                          | 2 | 528   | 121.619 | 55.678 | 45  | 248 |
|                          | 3 | 768   | 118.448 | 40.065 | 33  | 250 |
| (SX )                    |   |       |         |        |     |     |
| Total area               | 1 | 6970  | 63.705  | 27.086 | 27  | 237 |
|                          | 2 | 4550  | 66.129  | 28.449 | 17  | 238 |
|                          | 3 | 2726  | 64.039  | 30.306 | 27  | 237 |
| <i>Fol</i> infected area | 1 | 180   | 42.978  | 10.011 | 14  | 58  |
|                          | 2 | 240   | 41.783  | 12.242 | 11  | 93  |
|                          | 3 | 286   | 39.99   | 8.95   | 11  | 57  |
| (SS)                     |   |       |         |        |     |     |
| Total area               | 1 | 26904 | 88.515  | 77.587 | 12  | 237 |
|                          | 2 | 7812  | 97.049  | 70.978 | 15  | 232 |
|                          | 3 | 9844  | 99.55   | 51.497 | 25  | 249 |
| <i>Fol</i> infected area | 1 | 1890  | 67.252  | 23.064 | 11  | 201 |
|                          | 2 | 1680  | 71.443  | 20.283 | 11  | 163 |
|                          | 3 | 1927  | 74.171  | 44.149 | 11  | 233 |
| Dual gene (DXS )         |   |       |         |        |     |     |
| Total area               | 1 | 4020  | 86.213  | 62.325 | 14  | 240 |
|                          | 2 | 4875  | 85.953  | 63.452 | 14  | 240 |
|                          | 3 | 3658  | 72.629  | 48.976 | 14  | 240 |
| <i>Fol</i> infected area | 1 | 1638  | 67.854  | 31.036 | 14  | 237 |
|                          | 2 | 2254  | 67.633  | 20.679 | 14  | 192 |
|                          | 3 | 1845  | 66.353  | 45.967 | 11  | 235 |
| Arka Abhed               |   |       |         |        |     |     |
| Total area               | 1 | 1440  | 197.887 | 35.907 | 14  | 217 |
|                          | 2 | 1360  | 209.918 | 8.944  | 135 | 222 |
|                          | 3 | 1740  | 195.155 | 60.906 | 17  | 221 |
| <i>Fol</i> infected area | 1 | 812   | 173.878 | 64.973 | 16  | 235 |
|                          | 2 | 580   | 175.384 | 69.903 | 16  | 235 |
|                          | 3 | 558   | 177.715 | 56.761 | 30  | 234 |

| Tested lines    | <i>Fol</i> colonized (%) | <i>Fol</i> not detected (%) |
|-----------------|--------------------------|-----------------------------|
| Arka Abhed      | 25.33                    | 74.67                       |
| Mock            | 0                        | 100                         |
| WT              | 86.36                    | 13.64                       |
| SX              | 23.13                    | 76.87                       |
| SS              | 24.08                    | 75.92                       |
| Dual gene (DXS) | 14.31                    | 85.69                       |

| Table Analyzed                      | Data 1           | Table Analyzed                      | Data 2           |
|-------------------------------------|------------------|-------------------------------------|------------------|
| Column D                            | <b>SX</b>        | Column E                            | <b>SS</b>        |
| vs.                                 | vs.              | vs.                                 | vs.              |
| Column C                            | <b>WT</b>        | Column C                            | <b>WT</b>        |
|                                     |                  |                                     |                  |
| Paired t test                       |                  | Paired t test                       |                  |
| P value                             | 0.001            | P value                             | 0.001            |
| P value summary                     | ***              | P value summary                     | ***              |
| Significantly different (P < 0.05)? | Yes              | Significantly different (P < 0.05)? | Yes              |
| One- or two-tailed P value?         | Two-tailed       | One- or two-tailed P value?         | Two-tailed       |
| t, df                               | t=56.38, df=2    | t, df                               | t=43.69, df=2    |
| Number of pairs                     | 3                | Number of pairs                     | 3                |
| How big is the difference?          |                  | How big is the difference?          |                  |
| Mean of differences (D - C)         | -62.06           | Mean of differences (E - C)         | -60.5            |
| SD of differences                   | 1.907            | SD of differences                   | 2.398            |
| SEM of differences                  | 1.101            | SEM of differences                  | 1.385            |
| 95% confidence interval             | -66.80 to -57.32 | 95% confidence interval             | -66.45 to -54.54 |
| R squared (partial eta squared)     | 0.9994           | R squared (partial eta squared)     | 0.999            |

| Table Analyzed                      | Data 3                      | Table Analyzed                      | Data 4            |
|-------------------------------------|-----------------------------|-------------------------------------|-------------------|
| Column F                            | <b>Dual gene<br/>( DXS)</b> | Column G                            | <b>Arka Abhed</b> |
| vs.                                 | vs.                         | vs.                                 | vs.               |
| Column C                            | <b>WT</b>                   | Column C                            | <b>WT</b>         |
|                                     |                             |                                     |                   |
| Paired t test                       |                             | Paired t test                       |                   |
| P value                             | 0.001                       | P value                             | 0.001             |
| P value summary                     | ***                         | P value summary                     | ***               |
| Significantly different (P < 0.05)? | Yes                         | Significantly different (P < 0.05)? | Yes               |
| One- or two-tailed P value?         | Two-tailed                  | One- or two-tailed P value?         | Two-tailed        |
| t, df                               | t=94.38, df=2               | t, df                               | t=68.21, df=2     |
| Number of pairs                     | 3                           | Number of pairs                     | 3                 |
| How big is the difference?          |                             | How big is the difference?          |                   |
| Mean of differences (F - C)         | -71.27                      | Mean of differences (G - C)         | -60.68            |
| SD of differences                   | 1.308                       | SD of differences                   | 1.541             |
| SEM of differences                  | 0.7551                      | SEM of differences                  | 0.8895            |
| 95% confidence interval             | -74.52 to -68.02            | 95% confidence interval             | -64.50 to -56.85  |
| R squared (partial eta squared)     | 0.9998                      | R squared (partial eta squared)     | 0.9996            |



**Supplementary Table S6.** Data measurement of cell death/mm<sup>2</sup> in infected tomato leaves upon *Fol* 1322 infection in WT, single (SX and SS) and dual gene (DXS) constructs using Image J software.

| Target gene     |   | Area   | StDev  | Max | Min |
|-----------------|---|--------|--------|-----|-----|
| WT              | 1 | 95.981 | 36.25  | 15  | 221 |
|                 | 2 | 90.822 | 37.648 | 15  | 221 |
|                 | 3 | 92.724 | 37.569 | 15  | 222 |
| SX              | 1 | 54.396 | 31.236 | 2   | 209 |
|                 | 2 | 49.272 | 24.799 | 2   | 123 |
|                 | 3 | 52.291 | 27.9   | 9   | 167 |
| SS              | 1 | 61.178 | 33.219 | 6   | 167 |
|                 | 2 | 60.774 | 33.082 | 6   | 167 |
|                 | 3 | 63.492 | 34.873 | 6   | 167 |
| Dual gene (DXS) | 1 | 25.522 | 10.085 | 3   | 69  |
|                 | 2 | 25.594 | 11.21  | 3   | 78  |
|                 | 3 | 27.641 | 9.143  | 3   | 61  |
| Arka Abhed      | 1 | 64.716 | 29.877 | 2   | 131 |
|                 | 2 | 66.924 | 24.907 | 4   | 121 |
|                 | 3 | 62.875 | 18.51  | 10  | 103 |

| Table Analyzed                      | Data 1           | Table Analyzed                      | Data 2           |
|-------------------------------------|------------------|-------------------------------------|------------------|
| Column C                            | <b>SX</b>        | Column D                            | <b>SS</b>        |
| vs.                                 | vs.              | vs.                                 | vs.              |
| Column B                            | <b>WT</b>        | Column B                            | <b>WT</b>        |
| Paired t test                       |                  | Paired t test                       |                  |
| P value                             | 0.001            | P value                             | 0.0031           |
| P value summary                     | **               | P value summary                     | **               |
| Significantly different (P < 0.05)? | Yes              | Significantly different (P < 0.05)? | Yes              |
| One- or two-tailed P value?         | Two-tailed       | One- or two-tailed P value?         | Two-tailed       |
| t, df                               | t=108.9, df=2    | t, df                               | t=18.05, df=2    |
| Number of pairs                     | 3                | Number of pairs                     | 3                |
| How big is the difference?          |                  | How big is the difference?          |                  |
| Mean of differences (C - B)         | -41.19           | Mean of differences (D - B)         | -31.36           |
| SD of differences                   | 0.6552           | SD of differences                   | 3.009            |
| SEM of differences                  | 0.3783           | SEM of differences                  | 1.737            |
| 95% confidence interval             | -42.82 to -39.56 | 95% confidence interval             | -38.83 to -23.89 |
| R squared (partial eta squared)     | 0.9998           | R squared (partial eta squared)     | 0.9939           |
| Table Analyzed                      | Data 3           | Table Analyzed                      | Data 4           |
| Column F                            | Arka Abhed       | Column E                            | Dual gene (DXS)  |
| vs.                                 | vs.              | vs.                                 | vs.              |
| Column B                            | <b>WT</b>        | Column B                            | <b>WT</b>        |
| Paired t test                       |                  | Paired t test                       |                  |
| P value                             | 0.0051           | P value                             | 0.0007           |
| P value summary                     | **               | P value summary                     | ***              |
| Significantly different (P < 0.05)? | Yes              | Significantly different (P < 0.05)? | Yes              |
| One- or two-tailed P value?         | Two-tailed       | One- or two-tailed P value?         | Two-tailed       |
| t, df                               | t=13.79, df=2    | t, df                               | t=37.85, df=2    |
| Number of pairs                     | 3                | Number of pairs                     | 3                |
| How big is the difference?          |                  | How big is the difference?          |                  |
| Mean of differences (F - B)         | -35              | Mean of differences (E - B)         | -66.92           |
| SD of differences                   | 4.398            | SD of differences                   | 3.063            |
| SEM of differences                  | 2.539            | SEM of differences                  | 1.768            |
| 95% confidence interval             | -45.93 to -24.08 | 95% confidence interval             | -74.53 to -59.31 |
| R squared (partial eta squared)     | 0.9896           | R squared (partial eta squared)     | 0.9986           |

**Supplementary Table S7.** Data measurement of H<sub>2</sub>O<sub>2</sub> release/ mm<sup>2</sup> in infected tomato leaves upon *Fol* 1322 infection in WT, single (SX and SS) and dual gene (DXS) constructs using Image J software.

|                 |   | Area  | Stdev  | Min | Max |
|-----------------|---|-------|--------|-----|-----|
| WT              | 1 | 8.621 | 50.446 | 3   | 224 |
|                 | 2 | 8.432 | 47.731 | 3   | 224 |
|                 | 3 | 7.63  | 48.371 | 3   | 224 |
| SX              | 5 | 4.321 | 27.591 | 1   | 167 |
|                 | 6 | 4.62  | 30.629 | 1   | 192 |
|                 | 7 | 4.43  | 29.511 | 1   | 192 |
| SS              | 1 | 3.765 | 22.944 | 1   | 192 |
|                 | 2 | 3.57  | 21.913 | 1   | 161 |
|                 | 3 | 3.66  | 22.97  | 1   | 192 |
| Dual gene (DXS) | 1 | 2.543 | 14.77  | 1   | 117 |
|                 | 2 | 2.671 | 15.832 | 1   | 144 |
|                 | 3 | 2.45  | 15.907 | 1   | 128 |
| Arka Abhed      | 1 | 6.721 | 46.018 | 1   | 197 |
|                 | 2 | 6.56  | 42.823 | 1   | 208 |
|                 | 3 | 6.661 | 38.385 | 1   | 208 |

| Table Analyzed                      | Data 1           | Table Analyzed                      | Data 2           |
|-------------------------------------|------------------|-------------------------------------|------------------|
|                                     |                  |                                     |                  |
| Column C                            | <b>SX</b>        | Column D                            | <b>SS</b>        |
| vs.                                 | vs.              | vs.                                 | vs.              |
| Column B                            | <b>WT</b>        | Column B                            | <b>WT</b>        |
|                                     |                  |                                     |                  |
| Paired t test                       |                  | Paired t test                       |                  |
| P value                             | 0.0029           | P value                             | 0.0014           |
| P value summary                     | **               | P value summary                     | **               |
| Significantly different (P < 0.05)? | Yes              | Significantly different (P < 0.05)? | Yes              |
| One- or two-tailed P value?         | Two-tailed       | One- or two-tailed P value?         | Two-tailed       |
| t, df                               | t=18.43, df=2    | t, df                               | t=26.96, df=2    |
| Number of pairs                     | 3                | Number of pairs                     | 3                |
|                                     |                  |                                     |                  |
| How big is the difference?          |                  | How big is the difference?          |                  |
| Mean of differences (C - B)         | -41.97           | Mean of differences (D - B)         | -49.42           |
| SD of differences                   | 3.944            | SD of differences                   | 3.175            |
| SEM of differences                  | 2.277            | SEM of differences                  | 1.833            |
| 95% confidence interval             | -51.76 to -32.17 | 95% confidence interval             | -57.31 to -41.53 |
| R squared (partial eta squared)     | 0.9941           | R squared (partial eta squared)     | 0.9973           |

| Table Analyzed | Data 3            | Table Analyzed | Data 4                 |
|----------------|-------------------|----------------|------------------------|
|                |                   |                |                        |
| Column F       | <b>Arka Abhed</b> | Column E       | <b>Dual gene (DXS)</b> |
| vs.            | vs.               | vs.            | vs.                    |
| Column B       | <b>WT</b>         | Column B       | <b>WT</b>              |
|                |                   |                |                        |
| Paired t test  |                   | Paired t test  |                        |

|                                     |                  |                                     |                  |
|-------------------------------------|------------------|-------------------------------------|------------------|
| P value                             | 0.01             | P value                             | 0.001            |
| P value summary                     | *                | P value summary                     | **               |
| Significantly different (P < 0.05)? | Yes              | Significantly different (P < 0.05)? | Yes              |
| One- or two-tailed P value?         | Two-tailed       | One- or two-tailed P value?         | Two-tailed       |
| t, df                               | t=9.917, df=2    | t, df                               | t=30.96, df=2    |
| Number of pairs                     | 3                | Number of pairs                     | 3                |
|                                     |                  |                                     |                  |
| How big is the difference?          |                  | How big is the difference?          |                  |
| Mean of differences (F - B)         | -25.15           | Mean of differences (E - B)         | -56.02           |
| SD of differences                   | 4.393            | SD of differences                   | 3.134            |
| SEM of differences                  | 2.536            | SEM of differences                  | 1.81             |
| 95% confidence interval             | -36.07 to -14.24 | 95% confidence interval             | -63.80 to -48.23 |
| R squared (partial eta squared)     | 0.9801           | R squared (partial eta squared)     | 0.9979           |

**Supplementary Table S8.** Data measurement of fresh weight (g) of Mock, WT, single genes (SX and SS), dual gene (DXS) and Arka Abhed upon *Fol 1322* infected tomato plants.

| Fresh weight (g) |      |       |       |               |            |
|------------------|------|-------|-------|---------------|------------|
| Mock             | WT   | SX    | SS    | Dual gene DXS | Arka Abhed |
| 25.5             | 9.92 | 12.32 | 16.21 | 20.18         | 14.22      |
| 28.65            | 7.35 | 15.21 | 12.21 | 18.42         | 12.44      |
| 24.66            | 7.67 | 16.7  | 10.33 | 18.13         | 12.41      |
| 26.44            | 8.86 | 12.31 | 12.31 | 17.46         | 11.43      |

| Table Analyzed                      | Data 1        | Table Analyzed                      | Data 2        |
|-------------------------------------|---------------|-------------------------------------|---------------|
|                                     |               |                                     |               |
| Column C                            | <b>SX</b>     | Column D                            | <b>SS</b>     |
| vs.                                 | vs.           | vs.                                 | vs.           |
| Column B                            | <b>WT</b>     | Column B                            | <b>WT</b>     |
|                                     |               |                                     |               |
| Paired t test                       |               | Paired t test                       |               |
| P value                             | 0.0396        | P value                             | 0.0125        |
| P value summary                     | *             | P value summary                     | *             |
| Significantly different (P < 0.05)? | Yes           | Significantly different (P < 0.05)? | Yes           |
| One- or two-tailed P value?         | Two-tailed    | One- or two-tailed P value?         | Two-tailed    |
| t, df                               | t=3.497, df=3 | t, df                               | t=5.392, df=3 |
| Number of pairs                     | 4             | Number of pairs                     | 4             |
|                                     |               |                                     |               |
| How big is the difference?          |               | How big is the difference?          |               |
| Mean of differences (C - B)         | 5.685         | Mean of differences (D - B)         | 4.315         |



|                                 |                 |                                 |                |
|---------------------------------|-----------------|---------------------------------|----------------|
| SD of differences               | 3.251           | SD of differences               | 1.601          |
| SEM of differences              | 1.625           | SEM of differences              | 0.8003         |
| 95% confidence interval         | 0.5120 to 10.86 | 95% confidence interval         | 1.768 to 6.862 |
| R squared (partial eta squared) | 0.803           | R squared (partial eta squared) | 0.9065         |

| Table Analyzed                      | Data 3          | Table Analyzed                      | Data 4         |
|-------------------------------------|-----------------|-------------------------------------|----------------|
| Column E                            | Dual gene (DXS) | Column F                            | Arka Abhed     |
| vs.                                 | vs.             | vs.                                 | vs.            |
| Column B                            | WT              | Column B                            | WT             |
| Paired t test                       |                 | Paired t test                       |                |
| P value                             | 0.0003          | P value                             | 0.04           |
| P value summary                     | ***             | P value summary                     | *              |
| Significantly different (P < 0.05)? | Yes             | Significantly different (P < 0.05)? | Yes            |
| One- or two-tailed P value?         | Two-tailed      | One- or two-tailed P value?         | Two-tailed     |
| t, df                               | t=19.12, df=3   | t, df                               | t=7.470, df=3  |
| Number of pairs                     | 4               | Number of pairs                     | 4              |
| How big is the difference?          |                 | How big is the difference?          |                |
| Mean of differences (E - B)         | 10.1            | Mean of differences (F - B)         | 4.175          |
| SD of differences                   | 1.056           | SD of differences                   | 1.118          |
| SEM of differences                  | 0.5281          | SEM of differences                  | 0.5589         |
| 95% confidence interval             | 8.417 to 11.78  | 95% confidence interval             | 2.396 to 5.954 |
| R squared (partial eta squared)     | 0.9919          | R squared (partial eta squared)     | 0.949          |

**Supplementary Table S9.** Data measurement of disease severity of single and dual gene (DXS) in 4 weeks old tomato infected plants.

| Disease index (%) | 0   | 1  | 2  | 3  | 4  |
|-------------------|-----|----|----|----|----|
| Mock              | 100 |    |    |    |    |
| WT                |     |    | 25 |    | 75 |
| SX                |     | 25 | 25 | 50 |    |
| Dual gene (DXS)   |     | 25 | 25 | 25 | 25 |
| Dual gene DXS     | 75  |    |    | 25 |    |
| Arka Abhed        |     | 25 | 25 | 50 |    |

|                                             |        |
|---------------------------------------------|--------|
| Table Analyzed                              | Data 1 |
| Kruskal-Wallis test                         |        |
| P value                                     | 0.0465 |
| Exact or approximate P value?               | Exact  |
| P value summary                             | *      |
| Do the medians vary signif. ( $P < 0.05$ )? | Yes    |
| Number of groups                            | 5      |
| Kruskal-Wallis statistic                    | 8.562  |
| Data summary                                |        |
| Number of treatments (columns)              | 5      |
| Number of values (total)                    | 15     |

**Supplementary Table S10.** Data measurement of fungus colonization in WT and CRELs upon *Fol 1322* infection in tomato cv. AV

|                 | No fungus | Cotyledon node | 2nd node | 4 <sup>th</sup> node | Total sliced stem |
|-----------------|-----------|----------------|----------|----------------------|-------------------|
| Mock            | 0         |                |          |                      | 12                |
| WT              |           | 4              | 3        | 3                    | 12                |
| SX              |           | 3              | 3        |                      | 12                |
| SS              |           | 2              | 2        |                      | 12                |
| Dual gene (DXS) |           | 2              | 1        |                      | 12                |
| Arka Abhed      |           | 3              | 3        | 1                    | 12                |

| Fungus colonization (%) | No fungus | Cotyledon node | 2nd node | 4 <sup>th</sup> node |
|-------------------------|-----------|----------------|----------|----------------------|
| Mock                    | 0         |                |          |                      |
| WT                      | 16.67     | 33.33          | 25       | 25                   |
| SX                      | 50        | 25             | 25       |                      |
| SS                      | 66.68     | 16.66          | 16.66    |                      |
| Dual gene (DXS)         | 75.01     | 16.66          | 8.33     |                      |
| Arka Abhed              | 41.67     | 25             | 25       | 8.33                 |

|                                   |                      |         |                 |                   |          |
|-----------------------------------|----------------------|---------|-----------------|-------------------|----------|
| Table Analyzed                    | Data 1               |         |                 |                   |          |
| Two-way ANOVA                     | Ordinary             |         |                 |                   |          |
| Alpha                             | 0.05                 |         |                 |                   |          |
| Source of Variation               | % of total variation | P value | P value summary | Significant?      |          |
| Row Factor                        | 31.17                | 0.1365  | ns              | No                |          |
| Column Factor                     | 27.93                | 0.0659  | ns              | No                |          |
| ANOVA table                       | SS (Type III)        | DF      | MS              | F (DFn, DFd)      | P value  |
| Row Factor                        | 2654                 | 5       | 530.9           | F (5, 12) = 2.095 | P=0.1365 |
| Column Factor                     | 2378                 | 3       | 792.6           | F (3, 12) = 3.127 | P=0.0659 |
| Residual                          | 3041                 | 12      | 253.4           |                   |          |
| Data summary                      |                      |         |                 |                   |          |
| Number of columns (Column Factor) | 4                    |         |                 |                   |          |
| Number of rows (Row Factor)       | 6                    |         |                 |                   |          |
